# Supplementary material for: Hepatic Transcriptomics Reveals Reduced Lipogenesis in High-Salt Diet Mice
Source: MDPI journal article supplement (doi:10.3390/genes14050966), 2023-04-24
Supplement: s1 [file s1]

**Supplementary Table S1 The primers of DEGs validated by RT-qPCR analysis**

| <b>Gene</b>    | <b>Accession Number</b> | <b>Sequences</b>                                                    |
|----------------|-------------------------|---------------------------------------------------------------------|
| <i>Gapdh</i>   | NM_008084.3             | F-5'-aggtcgggtgtaacggattg-3'<br>R-5'-tgtagaccatgtagttgaggtca -3'    |
| <i>Acly</i>    | NM_134037               | F-5'- accctttcactggggatcaca -3'<br>R-5'- gacagggatcaggatttccttg -3' |
| <i>Fasn</i>    | NM_007988.3             | F-5'-ggaggtggtgatagccggtat-3'<br>R-5'-tggtgaatccatagagccag-3'       |
| <i>Scd1</i>    | NM_009127.4             | F-5'-ttcttgcgatacactctggtgc-3'<br>R-5'-cgggattgaatgttctgtcgt-3'     |
| <i>Cd36</i>    | NM_001159556            | F-5'- atgggctgtgatcggactg-3'<br>R-5'- gtcttccaataagcatgtctcc-3'     |
| <i>Acaca</i>   | NM_133360               | F-5'- atgggcggaatggtctcttc -3'<br>R-5'- tggggacctgtgtctcatcat -3'   |
| <i>Acot1</i>   | NM_012006               | F-5'- atacccctgtgactatcctga-3'<br>R-5'- caaacactcactaccaactgt-3'    |
| <i>G6pc</i>    | NM_008061.4             | F-5'-cgactcgctatctccaagtga-3'<br>R-5'-gttgaaccagtctccgacca-3'       |
| <i>Pck1</i>    | NM_011044.3             | F-5'-ctgcataacggtctggacttc-3'<br>R-5'-cagcaactgcccgtactcc-3'        |
| <i>Cyp4a10</i> | NM_010011.3             | F-5'- ttccctgatggacgtcttta-3'<br>R-5'- gcaaacctggaagggtcaaac-3'     |
| <i>Cyp4a14</i> | NM_007822.2             | F-5'-tttagccctacaaggtacttgga-3'<br>R-5'-gcagccactgccttcgtaa-3'      |
| <i>Cyp2d9</i>  | NM_010006.2             | F-5'-gctgaaagatgagtctgtctgg-3'<br>R-5'-tggtctcgtaccacagcaca-3'      |
| <i>Zfp9</i>    | NM_011763.2             | F-5'-cgtgacattaagggatgttgct-3'<br>R-5'-ccacacgataaccacagaga-3'      |
| <i>Plin4</i>   | NM_001372234.1          | F-5'-gtgtccaccaactcacagatg-3'<br>R-5'-ggaccattcctttgcagcat-3'       |
| <i>Slco1a1</i> | NM_013797.5             | F-5'-gtgcatacctagccaatcact-3'<br>R-5'-ccaggcccataaccacacatc-3'      |

|                 |                |                                                                       |
|-----------------|----------------|-----------------------------------------------------------------------|
| <i>Rdh9</i>     | NM_153133.2    | F-5'-gggccgagtatctttgtgtgg -3'<br>R-5'-tcagggaagtccaatagagaagg-3'     |
| <i>Ugt2b37</i>  | NM_053215.3    | F-5'- tggggccaacagtgtctatga -3'<br>R-5'- gcattgagcacatctgacctt-3'     |
| <i>Rdh11</i>    | NM_001362269.1 | F-5'- tgggcaggattcacttcata-3'<br>R-5'- gaggagtaccgctcaattca -3'       |
| <i>Cyp3a41b</i> | NM_001105159.1 | F-5'- aaagccgcctcgattctaagc-3'<br>R-5'- actacatcccgtgtgacaacc-3'      |
| <i>Ugt1a9</i>   | NM_201644.2    | F-5'- tctcgtcccatcagtaattt -3'<br>R-5'- tggttccacactctctccttg-3'      |
| <i>Aldh1a7</i>  | NM_011921.2    | F-5'- acttgaagttaggccctgc-3'<br>R-5'- tgtgaaggacactttgtcgatg-3'       |
| <i>Acsf5</i>    | NM_027976.2    | F-5'- tctgacgtttggaacggc-3'<br>R-5'- ctccctcaatccccacagac-3'          |
| <i>Cyp7a1</i>   | NM_007824.3    | F-5'- gggattgctgtggtagttagc-3'<br>R-5'- ggtatggaatcaacccgtgtgc-3'     |
| <i>Fabp5</i>    | NM_001272097.1 | F-5'- tgaaagagctaggagtaggactg-3'<br>R-5'- ctctcggtttgaccgtgatg-3'     |
| <i>Ehhadh</i>   | NM_023737.3    | F-5'- atggctgagtatctgaggctg-3'<br>R-5'- ggtccaaactagctttctggag -3'    |
| <i>Me1</i>      | NM_001198933.1 | F-5'-gtcgtgcatctctcacagaag -3'<br>R-5'-tgagggcagttggtttatcttt -3'     |
| <i>Plin2</i>    | NM_001403711.1 | F-5'-gacctgtgtcctccgcttat -3'<br>R-5'- caaccgcaatttgggtc-3'           |
| <i>Aqp8</i>     | NM_001109045.1 | F-5'- tgtgtagtatggacctacctgag-3'<br>R-5'- accgatagacatccgatgaagat -3' |
| <i>Acnat2</i>   | NM_001356289.1 | F-5'- aagcgggaacagattcaagaag-3'<br>R-5'- acgaaattcaactagaccccca-3'    |
| <i>Abcb1a</i>   | NM_011076.3    | F-5'- cagcagtcagtggtcttaca -3'<br>R-5'- atggctctttatcggtcctca-3'      |
| <i>Myliip</i>   | NM_153789.3    | F-5'- atgctgtgctatgtgacgagg -3'<br>R-5'- tcgatgatccctagacgctg -3'     |

|              |                |                                                                   |
|--------------|----------------|-------------------------------------------------------------------|
| <i>Sort1</i> | NM_001271599.1 | F-5'- cccggacttcacgccaag -3'<br>R-5'- aggacgagaataaccccagtg-3'    |
| <i>Lipg</i>  | NM_010720.3    | F-5'- atgcgaaacacggttttcctg -3'<br>R-5'- gtagctggtactccagtggg -3' |

---
