# Supplementary material for: Hepatic Transcriptomics Reveals Reduced Lipogenesis in High-Salt Diet Mice
Source: MDPI journal article supplement (doi:10.3390/genes14050966), 2023-04-24

A

### DEGs for female mice fed high-salt diet

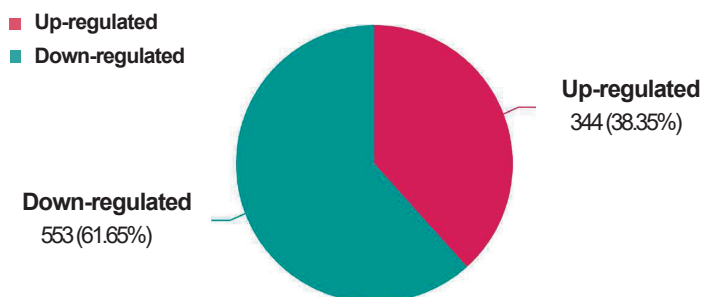

B

Pie chart of DEGs and qPCR verification of six more DEGs within the up-regulation group

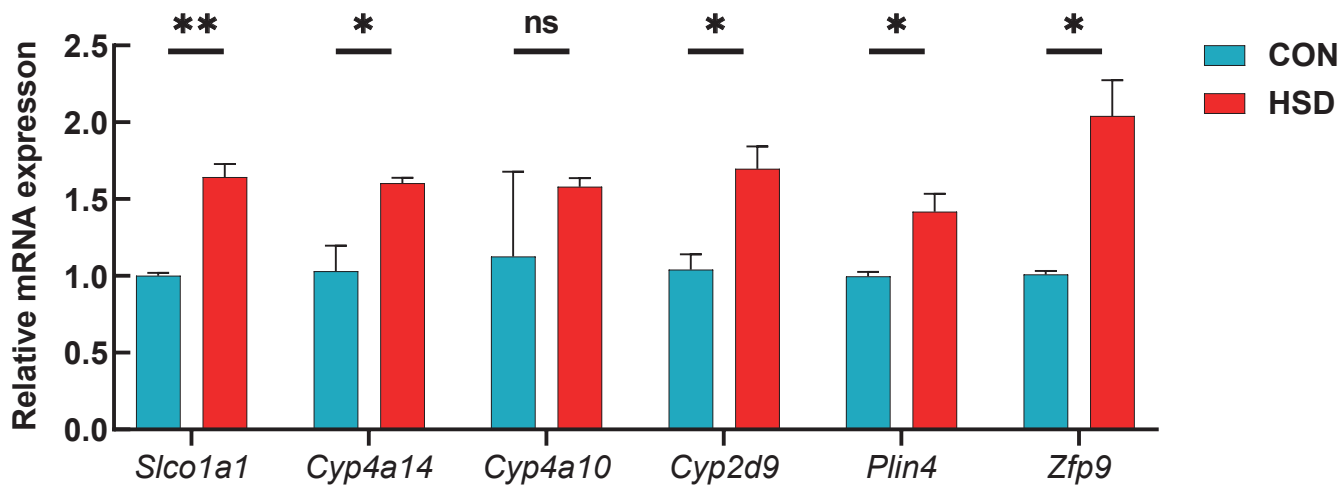

Supplement: s1 [file s1]
