# Supplementary material for: Hepatic Transcriptomics Reveals Reduced Lipogenesis in High-Salt Diet Mice
Source: MDPI journal article supplement (doi:10.3390/genes14050966), 2023-04-24
Supplement: s1 [file s1]

**Supplementary Table S2.** Statistic analysis of clean reads for transcriptome sequencing

| Library        | CONL2      | CONL3      | CONL4      | HSL6       | HSL8       | HSL9       |
|----------------|------------|------------|------------|------------|------------|------------|
| Total Reads    | 44,301,190 | 45,862,628 | 46,727,208 | 44,287,150 | 46,439,024 | 44,861,682 |
| Mapped Reads   | 43,025,413 | 44,261,179 | 45,408,987 | 42,991,091 | 45,038,393 | 43,511,441 |
| Mapping Rate   | 0.9712     | 0.9651     | 0.9718     | 0.9707     | 0.9698     | 0.9699     |
| UnMapped Reads | 1,275,777  | 1,601,449  | 1,318,221  | 1,296,059  | 1,400,631  | 1,350,241  |
| MultiMap Reads | 3,818,347  | 4,383,971  | 4,006,561  | 3,455,620  | 3,948,891  | 3,876,286  |
| MultiMap Rate  | 0.0862     | 0.0956     | 0.0857     | 0.078      | 0.085      | 0.0864     |
