# Supplementary material for: Hepatic Transcriptomics Reveals Reduced Lipogenesis in High-Salt Diet Mice
Source: Genes (Basel). 2023 Apr 24;14(5):966. doi: 10.3390/genes14050966 (PMC10218062; doi:10.3390/genes14050966)
Supplement: Supplementary file 1 [file genes-14-00966-s001.zip]

Archive with 11 entries (11 files):
- Supplementary Data S1_Full list of significantly differentially expressed genes in the mouse liver fed high-salt diet..xlsx.xlsx
- Supplementary Figure S1_Schematic description of animal experiments.pdf
- Supplementary Figure S2_Principal component analysis (PCA) for clustering.pdf
- Supplementary Figure S3_Pie chart of DEGs and qPCR verification of six more DEGs within the up-regulation group.pdf
- Supplementary Figure S4_ GO analysis of up-and down-regulated DEGs.pdf
- Supplementary Figure S5_Circus plot of  top 10 KEGG pathways..pdf
- Supplementary Figure S6_Verification of canonical metabolic pathways.pdf
- Supplementary Tables S1_The primers of DEGs validated by RT-qPCR analysis.pdf
- Supplementary Tables S2_Statistic analysis of clean reads for transcriptome sequencing.pdf
- Supplementary Tables S3_GO terms of DEGs in liver.xlsx
- Supplementary Tables S4_KEGG pathways of DEGs in liver.xlsx
