# Supplementary material for: Hepatic Transcriptomics Reveals Reduced Lipogenesis in High-Salt Diet Mice
Source: Genes (Basel). 2023 Apr 24;14(5):966. doi: 10.3390/genes14050966 (PMC10218062; doi:10.3390/genes14050966)
Supplement: Supplementary file 1 [file genes-14-00966-s001.zip › Supplementary Tables S3_GO terms of DEGs in liver.xlsx]

## Sheet: GO terms of DEGs in liver
Table S3. GO terms of DEGs in liver
Category	Term	Count	%	PValue	Genes	FDR
GOTERM_BP_DIRECT	GO:0006629~lipid metabolic process	55	6.56325	1.57e-08	IL1RN, VLDLR, CYP46A1, PRKAG3, CES2C, LIPG, SCD1, PLA2G4F, CYP4A10, ACOT13, ACSL5, GPCPD1, PLA2G15, CYP39A1, ACLY, BDH2, EHHADH, ANGPTL8, ASPG, ACOT2, ACOT1, ACOT6, ACPP, MGLL, PLIN5, DGKH, ACSS2, MGST3, GSTP1, INSIG1, ABHD2, FITM1, ACNAT2, CYP7A1, ACACB, ACACA, CYP17A1, NEU2, RDH11, RDH16, SC5D, UGT1A9, PCK1, HAO2, GSTM4, GSTM2, ADHFE1, SLC16A11, DHCR24, FMO5, GPAM, FABP5, FASN, PNPLA5, PNPLA6	4.83e-05
GOTERM_BP_DIRECT	GO:0008202~steroid metabolic process	17	2.02864	1.45e-05	G6PC, RDH9, INSIG1, CYP3A44, CYP3A11, DHCR24, VLDLR, CYP46A1, CYP7A1, CYP17A1, CYP39A1, SULT1B1, CYP2D9, CYP3A41B, RDH16, SC5D, SULT2A3	0.0222805
GOTERM_BP_DIRECT	GO:0007623~circadian rhythm	13	1.55131	7.24e-05	KLF10, NTRK2, BHLHE41, NR1D1, ADCY1, ARNTL, PER3, DBP, ID2, ID1, ID4, ID3, SFTPA1	0.0740608
GOTERM_BP_DIRECT	GO:0006631~fatty acid metabolic process	19	2.2673	0.000163	CYP4A10, ECI3, ACSL5, ACNAT2, ACACB, ACACA, PRKAG3, PLA2G15, GPAM, EHHADH, FASN, ACOT2, ACOT1, CRYL1, CD36, SCD1, ACOT6, HAO2, MGLL	0.125346
GOTERM_BP_DIRECT	GO:0042632~cholesterol homeostasis	12	1.43198	0.000407	CYP39A1, MYLIP, ABCG8, G6PC, CES1E, INSIG1, LIPG, APOA4, NR1D1, FGFR4, CYP7A1, TSKU	0.249874
GOTERM_BP_DIRECT	GO:0032869~cellular response to insulin stimulus	12	1.43198	0.00123012	CPEB1, G6PC, GPAM, GSTP1, MYC, INSIG1, INHBB, IRS2, SLC2A4, PCK1, SGK1, FOXO1	0.629001
GOTERM_BP_DIRECT	GO:0009611~response to wounding	12	1.43198	0.00174281	SERPINE2, DST, PVT1, ABHD2, MYC, TMPRSS4, SLC1A2, ID3, NMNAT3, INHBB, NEAT1, F3	0.763847
GOTERM_BP_DIRECT	GO:0032922~circadian regulation of gene expression	9	1.07399	0.00230033	PER3, ID2, USP2, ID1, ID4, BHLHE41, ID3, NR1D1, ARNTL	0.819981
GOTERM_BP_DIRECT	GO:0045599~negative regulation of fat cell differentiation	8	0.954654	0.00240542	SORT1, BBS12, INSIG1, ID4, LRP3, ZFPM1, FOXO1, ARNTL	0.819981
GOTERM_BP_DIRECT	GO:0006084~acetyl-CoA metabolic process	4	0.477327	0.00346481	ACLY, FASN, ACACB, ACACA	0.964395
GOTERM_BP_DIRECT	GO:0006637~acyl-CoA metabolic process	6	0.71599	0.00348657	GPAM, EHHADH, ACOT2, ACOT1, ACNAT2, ACOT6	0.964395
GOTERM_BP_DIRECT	GO:0006805~xenobiotic metabolic process	10	1.19332	0.00377208	SULT1B1, CYP2D9, GSTA4, CYP2A4, GSTP1, GSTA2, CYP46A1, CYP2G1, FMO5, SULT2A3	0.964395
GOTERM_BP_DIRECT	GO:0000122~negative regulation of transcription from RNA polymerase II promoter	48	5.72792	0.00477819	AU041133, NOTCH1, ZFP763, WWC1, BHLHE41, HMGB2, PSEN2, ZFP608, ZBTB42, CHD4, ZFP955B, BACH2, ZFP78, FOXQ1, DNAJB1, XPO1, ZFP13, PPP1R13L, MYC, HES1, ANKRD2, VHL, CD36, KMT5A, SAMD1, HMGN2, DACT1, HEXIM1, PCGF6, LEFTY1, GADD45A, USP2, 2610008E11RIK, NR1D1, ACVR2B, KLF16, HIPK2, MMP12, PER3, ID2, ID1, ID4, ID3, ZFP9, BCORL1, HAMP, ZFPM1, FGFR1	1
GOTERM_BP_DIRECT	GO:0035634~response to stilbenoid	5	0.596659	0.00508724	CYP2A4, SLCO1A1, GSTA2, APOA4, CD36	1
GOTERM_BP_DIRECT	GO:0010951~negative regulation of endopeptidase activity	9	1.07399	0.00555929	SERPINB1A, SERPINE2, SERPINA3K, SERPINB9, SERPINA9, SERPINA1E, SERPINA6, SERPINB8, SERPINA7	1
GOTERM_BP_DIRECT	GO:0002455~humoral immune response mediated by circulating immunoglobulin	4	0.477327	0.00605107	IGHG2B, IGHM, IGHG2C, IGHG1	1
GOTERM_BP_DIRECT	GO:0006393~termination of mitochondrial transcription	3	0.357995	0.00606855	MTERF2, MTHFS, MTERF1A	1
GOTERM_BP_DIRECT	GO:0016042~lipid catabolic process	11	1.31265	0.0069107	CYP39A1, NEU2, PLA2G4F, CES1E, ABHD2, ASPG, LIPG, APOA4, PNPLA5, PNPLA6, MGLL	1
GOTERM_BP_DIRECT	GO:0008610~lipid biosynthetic process	5	0.596659	0.00702023	ACLY, ACSS2, ACSL5, SC5D, SCD1	1
GOTERM_BP_DIRECT	GO:0015909~long-chain fatty acid transport	4	0.477327	0.00767817	FABP5, PLIN2, CD36, MFSD2A	1
GOTERM_BP_DIRECT	GO:0051923~sulfation	5	0.596659	0.00938408	SULT1B1, SULT1C2, SULT2A7, SULT3A2, SULT2A3	1
GOTERM_BP_DIRECT	GO:0055088~lipid homeostasis	7	0.835322	0.00946279	G6PC, ABHD8, APOA4, PNPLA5, TLCD1, SCD1, ACACA	1
GOTERM_BP_DIRECT	GO:0048711~positive regulation of astrocyte differentiation	4	0.477327	0.00953881	NOTCH1, SERPINE2, ID2, HES1	1
GOTERM_BP_DIRECT	GO:0006978~DNA damage response, signal transduction by p53 class mediator resulting in transcription of p21 class mediator	4	0.477327	0.00953881	RBM38, CDKN1A, TFAP4, HIPK2	1
GOTERM_BP_DIRECT	GO:0070640~vitamin D3 metabolic process	3	0.357995	0.00989676	UGT1A5, FGFR4, FGFR1	1
GOTERM_BP_DIRECT	GO:0007044~cell-substrate junction assembly	3	0.357995	0.00989676	ITGB3, ITGA5, TNS1	1
GOTERM_BP_DIRECT	GO:1990379~lipid transport across blood brain barrier	3	0.357995	0.00989676	FABP5, CD36, MFSD2A	1
GOTERM_BP_DIRECT	GO:0006633~fatty acid biosynthetic process	8	0.954654	0.0102158	ACLY, FASN, LIPG, SCD1, ACACB, ACACA, MGLL, PRKAG3	1
GOTERM_BP_DIRECT	GO:0048511~rhythmic process	12	1.43198	0.0115414	KLF10, DBP, PER3, PSPC1, ID2, USP2, ID1, BHLHE41, ID3, ADCY1, NR1D1, ARNTL	1
GOTERM_BP_DIRECT	GO:0072089~stem cell proliferation	8	0.954654	0.0117444	L3MBTL2, SETD1A, ID4, LIG4, IRS2, ABCB1A, BYSL, FGFR1	1
GOTERM_BP_DIRECT	GO:0006986~response to unfolded protein	7	0.835322	0.0121064	EDEM3, HSP90AA1, HSPH1, SYVN1, HSPB1, YOD1, HSPA1B	1
GOTERM_BP_DIRECT	GO:0050778~positive regulation of immune response	5	0.596659	0.0138099	IGHG2B, IGHM, IGHG1, C8B, C8A	1
GOTERM_BP_DIRECT	GO:0031999~negative regulation of fatty acid beta-oxidation	3	0.357995	0.0145268	ACACB, PLIN5, MFSD2A	1
GOTERM_BP_DIRECT	GO:0032091~negative regulation of protein binding	8	0.954654	0.0173153	CDKN1A, DHRS7B, MYC, ID1, XIRP1, SORL1, ZFPM1, DACT1	1
GOTERM_BP_DIRECT	GO:0048715~negative regulation of oligodendrocyte differentiation	4	0.477327	0.0194211	NOTCH1, ID2, ID4, HES1	1
GOTERM_BP_DIRECT	GO:0051131~chaperone-mediated protein complex assembly	4	0.477327	0.0194211	HSP90AA1, BBS10, BBS12, PSMG3	1
GOTERM_BP_DIRECT	GO:2000646~positive regulation of receptor catabolic process	3	0.357995	0.0199026	PTPN1, HAMP2, HAMP	1
GOTERM_BP_DIRECT	GO:0006650~glycerophospholipid metabolic process	3	0.357995	0.0199026	PLA2G15, GPAM, PGP	1
GOTERM_BP_DIRECT	GO:0007420~brain development	17	2.02864	0.0201572	PFKFB3, ZFHX2, SLC23A1, AMIGO1, SETD1A, PBX3, IRS2, ADCY1, HNMT, DMXL2, DDIT4, STMN1, ID4, SLC38A3, CFAP43, FGFR1, MFSD2A	1
GOTERM_BP_DIRECT	GO:0090630~activation of GTPase activity	9	1.07399	0.0223516	TIAM2, USP6NL, RALGAPB, ARHGEF26, RCC2, SGSM2, SCRIB, RANGAP1, EPHA2	1
GOTERM_BP_DIRECT	GO:0071285~cellular response to lithium ion	4	0.477327	0.0225166	GSTA4, CDH1, ID2, LIG4	1
GOTERM_BP_DIRECT	GO:0010867~positive regulation of triglyceride biosynthetic process	4	0.477327	0.0225166	GPAM, ACSL5, PLIN5, MFSD2A	1
GOTERM_BP_DIRECT	GO:0051930~regulation of sensory perception of pain	6	0.71599	0.0227839	TMEM100, ZFHX2, FABP5, ACPP, MGLL, FGFR1	1
GOTERM_BP_DIRECT	GO:0015908~fatty acid transport	5	0.596659	0.0237509	PLA2G4F, FABP5, ACSL5, CD36, MFSD2A	1
GOTERM_BP_DIRECT	GO:0006879~cellular iron ion homeostasis	6	0.71599	0.0246068	HAMP2, SCARA5, MYC, ATP6V0A2, HAMP, MON1A	1
GOTERM_BP_DIRECT	GO:0006635~fatty acid beta-oxidation	6	0.71599	0.0246068	BDH2, EHHADH, SESN2, ECI3, ECHDC1, TUBA8	1
GOTERM_BP_DIRECT	GO:0010466~negative regulation of peptidase activity	10	1.19332	0.0251572	SERPINB1A, SERPINE2, NGP, MUG1, TFPI2, SERPINA3K, A2ML1, SERPINA9, SERPINA1E, SERPINB8	1
GOTERM_BP_DIRECT	GO:0048252~lauric acid metabolic process	3	0.357995	0.0259709	CYP4A31, CYP4A10, CYP4A14	1
GOTERM_BP_DIRECT	GO:0060271~cilium assembly	14	1.67064	0.0292892	IQCB1, NOTCH1, FBF1, CELSR2, CDC14B, TTC30B, ABLIM3, TMEM237, RFX4, CEP70, CFAP43, CFAP54, DZIP1, TTLL8	1
GOTERM_BP_DIRECT	GO:0010165~response to X-ray	4	0.477327	0.029463	THBD, BLM, CDKN1A, LIG4	1
GOTERM_BP_DIRECT	GO:0042026~protein refolding	4	0.477327	0.029463	HSP90AA1, DNAJA4, HSPB1, HSPA1B	1
GOTERM_BP_DIRECT	GO:0032880~regulation of protein localization	9	1.07399	0.0298416	HSP90AA1, RALGAPB, CDH1, ITGB3, TESK1, DVL3, VHL, SGK1, CELSR2	1
GOTERM_BP_DIRECT	GO:0006749~glutathione metabolic process	7	0.835322	0.0313771	GSTM4, GSTM2, GSTA4, GSTP1, GSTA2, GSTT2, NAT8F7	1
GOTERM_BP_DIRECT	GO:0010890~positive regulation of sequestering of triglyceride	3	0.357995	0.0326812	FITM1, PLIN2, PLIN5	1
GOTERM_BP_DIRECT	GO:0051443~positive regulation of ubiquitin-protein transferase activity	4	0.477327	0.0333118	ARRDC4, DCUN1D3, DCUN1D4, ARRDC3	1
GOTERM_BP_DIRECT	GO:0009058~biosynthetic process	5	0.596659	0.034174	ALAS1, FASN, NMNAT3, ACCS, GCAT	1
GOTERM_BP_DIRECT	GO:0006693~prostaglandin metabolic process	5	0.596659	0.034174	CES2C, GSTM2, CES2E, GSTP1, CES2H	1
GOTERM_BP_DIRECT	GO:0008203~cholesterol metabolic process	9	1.07399	0.0356984	CES1E, INSIG1, APOA4, DHCR24, VLDLR, CYP46A1, CYP7A1, SULT2A3, TSKU	1
GOTERM_BP_DIRECT	GO:0006869~lipid transport	11	1.31265	0.0366175	ABCG8, FABP5, SPNS2, APOA4, TNFAIP8L3, LBP, VLDLR, CD36, C2CD2L, OSBP2, MFSD2A	1
GOTERM_BP_DIRECT	GO:0006641~triglyceride metabolic process	5	0.596659	0.0371339	G6PC, GPAM, INSIG1, SCD1, CD36	1
GOTERM_BP_DIRECT	GO:0006469~negative regulation of protein kinase activity	7	0.835322	0.0371909	GADD45B, GADD45A, GSTP1, WNK4, HSPB1, CEP85, SHB	1
GOTERM_BP_DIRECT	GO:0007010~cytoskeleton organization	9	1.07399	0.0388989	SVIL, SPRYD3, ABLIM3, DST, PSTPIP2, MICAL2, EPPK1, CAMSAP1, CAP2	1
GOTERM_BP_DIRECT	GO:0007169~transmembrane receptor protein tyrosine kinase signaling pathway	9	1.07399	0.0388989	NTRK2, ERBB4, INSRR, BLNK, STAP1, GFRA1, FGFR4, FGFR1, EPHA2	1
GOTERM_BP_DIRECT	GO:0042593~glucose homeostasis	11	1.31265	0.0393322	SUCNR1, G6PC, FABP5, SESN2, DMXL2, SLC2A4, CD36, MUP11, PCK1, FGFR4, FOXO1	1
GOTERM_BP_DIRECT	GO:0070857~regulation of bile acid biosynthetic process	3	0.357995	0.0399852	CES1E, FGFR4, CYP7A1	1
GOTERM_BP_DIRECT	GO:0006707~cholesterol catabolic process	3	0.357995	0.0399852	CYP39A1, CYP46A1, CYP7A1	1
GOTERM_BP_DIRECT	GO:0046456~icosanoid biosynthetic process	3	0.357995	0.0399852	CYP4A31, CYP4A10, CYP4A14	1
GOTERM_BP_DIRECT	GO:0070989~oxidative demethylation	4	0.477327	0.0417494	CYP2D9, CYP3A41B, CYP3A44, CYP3A11	1
GOTERM_BP_DIRECT	GO:0007585~respiratory gaseous exchange	4	0.477327	0.0417494	MAFB, CHRNA4, PBX3, SFTPA1	1
GOTERM_BP_DIRECT	GO:0006865~amino acid transport	6	0.71599	0.042563	SLC6A9, MYC, SLC7A15, SLC1A2, SLC38A3, SLC38A2	1
GOTERM_BP_DIRECT	GO:0060395~SMAD protein signal transduction	7	0.835322	0.0459514	LEFTY1, GDF15, INHBB, GDF3, AFP, INHBC, HIPK2	1
GOTERM_BP_DIRECT	GO:0006520~cellular amino acid metabolic process	4	0.477327	0.0463316	HDC, ASPG, CAD, ACCS	1
GOTERM_BP_DIRECT	GO:0006807~nitrogen compound metabolic process	4	0.477327	0.0463316	MYO1E, TIPARP, CAD, GLUL	1
GOTERM_BP_DIRECT	GO:0043086~negative regulation of catalytic activity	4	0.477327	0.0463316	NQO1, NOTCH1, ACACB, DGKH	1
GOTERM_BP_DIRECT	GO:0055072~iron ion homeostasis	5	0.596659	0.0468705	BDH2, SCARA5, STEAP2, HAMP, LTF	1
GOTERM_BP_DIRECT	GO:0035690~cellular response to drug	7	0.835322	0.0483253	QDPR, BLM, RAP2A, MYC, CAD, PDE4B, ADSSL1	1
GOTERM_BP_DIRECT	GO:0010629~negative regulation of gene expression	20	2.38663	0.050256	CDKN1A, L3MBTL2, NOTCH1, TIPARP, SFMBT2, HMGB2, LRP3, CHD4, ACACB, TFAP4, MYC, ID2, ID1, ID3, HES1, VHL, CD36, FGFR4, GAS2L1, FGFR1	1
GOTERM_BP_DIRECT	GO:0019216~regulation of lipid metabolic process	5	0.596659	0.0504013	ID2, ANGPTL8, TNFAIP8L3, NR1D1, FGFR4	1
GOTERM_BP_DIRECT	GO:0006954~inflammatory response	20	2.38663	0.0546803	KDM6B, CD163, IL1RN, IL1R1, RARRES2, HMGB2, WNK4, CXCL1, PPBP, MFHAS1, SERPINB1A, CAMK4, DHRS7B, FASN, S1PR3, CHIL3, S100A9, HAMP, S100A8, EPHA2	1
GOTERM_BP_DIRECT	GO:0009267~cellular response to starvation	7	0.835322	0.0558938	KLF10, INHBB, GAS2L1, GLUL, FOXA3, FOXO1, MFSD2A	1
GOTERM_BP_DIRECT	GO:0032000~positive regulation of fatty acid beta-oxidation	3	0.357995	0.0561949	ACSL5, IRS2, PLIN5	1
GOTERM_BP_DIRECT	GO:0014075~response to amine	3	0.357995	0.0561949	NQO1, CAD, HNMT	1
GOTERM_BP_DIRECT	GO:0001676~long-chain fatty acid metabolic process	4	0.477327	0.0562025	ACOT2, ACOT1, ACSL5, CD36	1
GOTERM_BP_DIRECT	GO:0007616~long-term memory	5	0.596659	0.0578876	NTRK2, CAMK4, SLC2A4, ADCY1, SGK1	1
GOTERM_BP_DIRECT	GO:0002437~inflammatory response to antigenic stimulus	4	0.477327	0.0614813	KDM6B, IL1RN, NOTCH1, HMGB2	1
GOTERM_BP_DIRECT	GO:0045494~photoreceptor cell maintenance	5	0.596659	0.0618412	IQCB1, BBS10, BBS12, PROM1, USH2A	1
GOTERM_BP_DIRECT	GO:0008283~cell proliferation	18	2.14797	0.063082	LEFTY1, NKX2-6, NOTCH1, LIG4, IRS2, SCRIB, BYSL, HIPK2, MYC, LIPG, ID4, HES1, GNAT1, GLUL, IL11RA1, FGFR1, PDK1, ZPR1	1
GOTERM_BP_DIRECT	GO:0070221~sulfide oxidation, using sulfide:quinone oxidoreductase	2	0.238663	0.064001	TSTD1, SQOR	1
GOTERM_BP_DIRECT	GO:1904255~negative regulation of iron channel activity	2	0.238663	0.064001	HAMP2, HAMP	1
GOTERM_BP_DIRECT	GO:2001295~malonyl-CoA biosynthetic process	2	0.238663	0.064001	ACACB, ACACA	1
GOTERM_BP_DIRECT	GO:0032413~negative regulation of ion transmembrane transporter activity	2	0.238663	0.064001	HAMP2, HAMP	1
GOTERM_BP_DIRECT	GO:1904039~negative regulation of ferrous iron export	2	0.238663	0.064001	HAMP2, HAMP	1
GOTERM_BP_DIRECT	GO:0070904~transepithelial L-ascorbic acid transport	2	0.238663	0.064001	SLC23A2, SLC23A1	1
GOTERM_BP_DIRECT	GO:0002946~tRNA C5-cytosine methylation	2	0.238663	0.064001	NSUN6, TRDMT1	1
GOTERM_BP_DIRECT	GO:0061402~positive regulation of transcription from RNA polymerase II promoter in response to acidic pH	2	0.238663	0.064001	SLC38A3, PCK1	1
GOTERM_BP_DIRECT	GO:0015882~L-ascorbic acid transport	2	0.238663	0.064001	SLC23A2, SLC23A1	1
GOTERM_BP_DIRECT	GO:0010628~positive regulation of gene expression	27	3.22196	0.0656107	NOTCH1, PSG18, ITGB3, HMGB2, LRP3, 4931414P19RIK, MYC, BLNK, STAP1, HES1, CD36, NAT8F7, SLC38A2, NTRK2, SETD1A, SERPINB9, MUP11, F3, MMP12, DNAJA4, ID2, ID1, AGO2, ID4, ID3, FGFR4, ZPR1	1
GOTERM_BP_DIRECT	GO:0050767~regulation of neurogenesis	5	0.596659	0.0659337	NOTCH1, BHLHE41, HMGB2, HES1, ARNTL	1
GOTERM_BP_DIRECT	GO:2000134~negative regulation of G1/S transition of mitotic cell cycle	5	0.596659	0.0659337	ZC3H12D, CDKN1A, GPNMB, DCUN1D3, DACT1	1
GOTERM_BP_DIRECT	GO:0019369~arachidonic acid metabolic process	5	0.596659	0.0659337	CYP2D9, CYP4A31, CYP4A10, CYP4A14, MGLL	1
GOTERM_BP_DIRECT	GO:0050829~defense response to Gram-negative bacterium	9	1.07399	0.0666793	IL22RA1, IGHM, HAMP2, RARRES2, HMGB2, LBP, MR1, HAMP, LTF	1
GOTERM_BP_DIRECT	GO:0010971~positive regulation of G2/M transition of mitotic cell cycle	4	0.477327	0.0669818	RAD51B, RCC2, CDC25A, LMNB1	1
GOTERM_BP_DIRECT	GO:0019915~lipid storage	4	0.477327	0.0669818	FITM1, PLIN2, CD36, PLIN5	1
GOTERM_BP_DIRECT	GO:0030509~BMP signaling pathway	8	0.954654	0.0676878	TMEM100, LEFTY1, GDF15, ID1, SLC39A5, HES1, GDF3, ACVR2B	1
GOTERM_BP_DIRECT	GO:0045732~positive regulation of protein catabolic process	7	0.835322	0.0700083	MYLIP, HSP90AA1, TIPARP, SORL1, HAMP, FOXO1, DACT1	1
GOTERM_BP_DIRECT	GO:0045184~establishment of protein localization	5	0.596659	0.0701635	RIPOR2, RAP2A, RCC2, DZIP1, USH2A	1
GOTERM_BP_DIRECT	GO:0000082~G1/S transition of mitotic cell cycle	6	0.71599	0.0702254	CDKN1A, MYC, ID4, RBBP8, E2F3, CDC25A	1
GOTERM_BP_DIRECT	GO:0042178~xenobiotic catabolic process	4	0.477327	0.0726982	GSTM4, CYP2D9, GSTM2, GSTA2	1
GOTERM_BP_DIRECT	GO:0043651~linoleic acid metabolic process	4	0.477327	0.0726982	CYP4A31, GSTP1, CYP4A10, CYP4A14	1
GOTERM_BP_DIRECT	GO:0022604~regulation of cell morphogenesis	4	0.477327	0.0726982	IGHM, RAC3, CAMSAP1, BCL9L	1
GOTERM_BP_DIRECT	GO:0033674~positive regulation of kinase activity	6	0.71599	0.0737901	NTRK2, ERBB4, INSRR, FGFR4, FGFR1, EPHA2	1
GOTERM_BP_DIRECT	GO:1903364~positive regulation of cellular protein catabolic process	3	0.357995	0.0742623	HSP90AA1, HAMP, DACT1	1
GOTERM_BP_DIRECT	GO:0072091~regulation of stem cell proliferation	3	0.357995	0.0742623	NOTCH1, HMGB2, FGFR1	1
GOTERM_BP_DIRECT	GO:0042448~progesterone metabolic process	3	0.357995	0.0742623	AFP, CYP46A1, CYP17A1	1
GOTERM_BP_DIRECT	GO:0043407~negative regulation of MAP kinase activity	5	0.596659	0.0745291	PTPN1, DUSP1, GSTP1, SPRY4, SORL1	1
GOTERM_BP_DIRECT	GO:0016485~protein processing	7	0.835322	0.0761795	MAFB, BMP1, MYC, XPNPEP3, TMPRSS4, PSEN2, F3	1
GOTERM_BP_DIRECT	GO:0043065~positive regulation of apoptotic process	19	2.2673	0.0771356	NOTCH1, TNFRSF12A, GADD45B, GADD45A, DUSP1, DCUN1D3, HTRA4, HIP1R, PSEN2, SCRIB, FOXO1, LGALS1, TFAP4, ZMAT3, RASSF6, TNFSF10, ID3, PHLDA1, TNFRSF22	1
GOTERM_BP_DIRECT	GO:0045662~negative regulation of myoblast differentiation	4	0.477327	0.0786244	NOTCH1, ID3, GDF3, ANKRD2	1
GOTERM_BP_DIRECT	GO:0031100~animal organ regeneration	5	0.596659	0.0790286	CDKN1A, NOTCH1, NNMT, GSTP1, CAD	1
GOTERM_BP_DIRECT	GO:0010862~positive regulation of pathway-restricted SMAD protein phosphorylation	5	0.596659	0.0790286	LEFTY1, GDF15, INHBB, GDF3, INHBC	1
GOTERM_BP_DIRECT	GO:0050679~positive regulation of epithelial cell proliferation	7	0.835322	0.079377	NOTCH1, NKX2-6, ERBB4, MYC, ID1, VHL, GLUL	1
GOTERM_BP_DIRECT	GO:2000811~negative regulation of anoikis	3	0.357995	0.0838966	NTRK2, NOTCH1, ITGA5	1
GOTERM_BP_DIRECT	GO:0010832~negative regulation of myotube differentiation	3	0.357995	0.0838966	NOTCH1, BHLHE41, ANKRD2	1
GOTERM_BP_DIRECT	GO:0007517~muscle organ development	6	0.71599	0.0850622	UNC45A, RIPOR2, USP2, ZBTB42, ID3, HDGFL2	1
GOTERM_BP_DIRECT	GO:0071364~cellular response to epidermal growth factor stimulus	5	0.596659	0.0884219	ERBB4, GSTP1, MYC, CAD, ZPR1	1
GOTERM_BP_DIRECT	GO:0016064~immunoglobulin mediated immune response	4	0.477327	0.0910797	IGHG2B, IGHM, IGHG2C, IGHG1	1
GOTERM_BP_DIRECT	GO:0006898~receptor-mediated endocytosis	6	0.71599	0.0930506	SCARA5, MICALL1, HIP1R, VLDLR, CD36, SORL1	1
GOTERM_BP_DIRECT	GO:2000648~positive regulation of stem cell proliferation	5	0.596659	0.0933113	EPCAM, SETD1A, ID4, IRS2, FGFR1	1
GOTERM_BP_DIRECT	GO:0006068~ethanol catabolic process	3	0.357995	0.0938841	SULT1B1, ALDH1A7, SULT2A3	1
GOTERM_BP_DIRECT	GO:0046323~glucose import	3	0.357995	0.0938841	SORT1, SESN2, SLC2A4	1
GOTERM_BP_DIRECT	GO:0060100~positive regulation of phagocytosis, engulfment	3	0.357995	0.0938841	STAP1, LBP, CD36	1
GOTERM_BP_DIRECT	GO:0051174~regulation of phosphorus metabolic process	2	0.238663	0.094451	FGFR4, FGFR1	1
GOTERM_BP_DIRECT	GO:1903841~cellular response to arsenite(3-)	2	0.238663	0.094451	MYC, SLC38A2	1
GOTERM_BP_DIRECT	GO:0070488~neutrophil aggregation	2	0.238663	0.094451	S100A9, S100A8	1
GOTERM_BP_DIRECT	GO:0021847~ventricular zone neuroblast division	2	0.238663	0.094451	DCT, FGFR1	1
GOTERM_BP_DIRECT	GO:2000974~negative regulation of pro-B cell differentiation	2	0.238663	0.094451	NOTCH1, HES1	1
GOTERM_BP_DIRECT	GO:0061623~glycolytic process from galactose	2	0.238663	0.094451	GALE, GALT	1
GOTERM_BP_DIRECT	GO:0001692~histamine metabolic process	2	0.238663	0.094451	HDC, HNMT	1
GOTERM_BP_DIRECT	GO:0050746~regulation of lipoprotein metabolic process	2	0.238663	0.094451	ANGPTL8, LIPG	1
GOTERM_BP_DIRECT	GO:0045967~negative regulation of growth rate	2	0.238663	0.094451	NOTCH1, TMPRSS4	1
GOTERM_BP_DIRECT	GO:0070328~triglyceride homeostasis	4	0.477327	0.0975954	ABCG8, ANGPTL8, SESN2, APOA4	1
GOTERM_BP_DIRECT	GO:0045600~positive regulation of fat cell differentiation	5	0.596659	0.098326	ZFP385A, RARRES2, ID2, GDF3, DACT1	1
	CC	Count	%	PValue	Genes
GOTERM_CC_DIRECT	GO:0005737~cytoplasm	298	35.5609	7.79e-07	IPO13, SLC23A2, JRK, IL1RN, SLC23A1, ISOC2B, DIXDC1, TESK1, CYP3A11, HSF2BP, BACH2, ZC3H12D, CYP2D9, HERC2, LGALS1, CSPP1, MYC, FAM110C, STMN1, SULT2A7, CPNE2, GNAT1, CEP97, SOX7, GLUL, SULT2A3, ACAD12, ARRDC4, TSTD1, ARRDC3, CLEC11A, ATG10, CIRBP, YOD1, DNAAF5, SCRIB, CTPS, TIAM2, DDIT4, ACOT1, PDE1A, DCUN1D3, FBF1, WNK4, NOLC1, NEU2, HSPH1, PCBP4, CEP70, PCK1, CEP76, GSTM4, HEXIM1, GSTM2, GADD4…	0.000205
GOTERM_CC_DIRECT	GO:0043231~intracellular membrane-bounded organelle	72	8.59189	7.82e-07	RDH9, AQP8, MPV17L, ECI3, CYP3A11, D130043K22RIK, SLC2A4, CYP46A1, CES2C, CYP2D9, XPO1, CES2E, CES2H, BLNK, RAC3, SCD1, ANKRD2, CD36, RRP12, GLUL, ARRDC4, G6PC, SFMBT2, CYP4A10, CYP3A44, CYP4A14, VPS37B, RANGAP1, SERPINA1E, SORCS2, PLA2G15, CYP39A1, RNF125, DCT, CYP2A4, COL4A3, CYP3A41B, PLIN5, OSBP2, DGKH, CTDP1, ACSS2, MGST3, ASAP3, FOXK2, CYP7A1, CYP17A1, ARNTL, NEU2, NACC1, RBBP8, RDH16, ATP6…	0.000205
GOTERM_CC_DIRECT	GO:0005789~endoplasmic reticulum membrane	51	6.08592	7.88e-05	CLSTN3, RDH9, CYP3A11, ATP2A2, CYP46A1, CYP2D9, PTGFRN, SCD1, NAT8F7, TMEM14A, MFSD2A, SCARA3, G6PC, DST, CYP4A10, CYP3A44, ACSL5, CYP4A14, SLC35G1, MR1, CYP39A1, F830016B08RIK, CYP2A4, CYP3A41B, SGK1, SEC22C, NOTCH1, MGST3, PSEN2, FITM1, TPTE, GRAMD4, CYP7A1, CYP17A1, RDH11, DHRS7B, RDH16, SC5D, 9130409I23RIK, UGT1A9, SORT1, SLC16A11, DHCR24, SORL1, FMO5, RNF103, EBPL, TMCC2, PNPLA6, RNF186, C2C…	0.0133704
GOTERM_CC_DIRECT	GO:0005615~extracellular space	94	11.2172	0.000102	IGHM, IL1RN, SERPINE2, HMGB2, E130311K13RIK, CXCL1, NENF, VLDLR, SERPINA9, C8B, ORM3, SERPINA6, SERPINA7, C8A, TSKU, JCHAIN, VPREB3, THBD, IGHG1, LGALS1, LIPG, TNFSF10, HMCN2, PRSS8, LBP, HMGN2, SCARA3, LEFTY1, IL1R1, COL25A1, CYP4A10, CLEC11A, OMD, MUP15, APOA4, CYP4A14, SERPINB9, GFRA1, MUP7, MUP11, SERPINA1E, MR1, F3, SERPINB8, IGLV1, PLA2G15, MMP12, IGHG2B, IGHG2C, OLFM3, NGP, COL4A3, CHIL3, …	0.0133704
GOTERM_CC_DIRECT	GO:0005783~endoplasmic reticulum	79	9.42721	0.000262	COLGALT2, CLSTN3, CYP3A11, ATP2A2, NENF, CYP46A1, GIMAP8, TMEM100, VPREB3, CES2C, CYP2D9, AIFM3, CES2E, PTGFRN, SCD1, CD36, NAT8F7, GLUL, TMEM14A, MFSD2A, SCARA3, G6PC, DST, CYP4A10, ACSL5, CYP4A14, SLC35G1, SERPINA1E, MR1, CYP39A1, COL4A3, CYP3A41B, CHIL3, RAB38, ITGA5, SGK1, CRELD2, SEC22C, NOTCH1, MGST3, INSIG1, PSEN2, FITM1, GRAMD4, CYP7A1, CYP17A1, RDH11, DHRS7B, UGT1A5, RDH16, SC5D, PROM1, …	0.0275014
GOTERM_CC_DIRECT	GO:0005576~extracellular region	85	10.1432	0.000892	IGHM, IL1RN, SERPINE2, LEAP2, LAMC3, HMGB2, CXCL1, NENF, SSC4D, SERPINA9, C8B, SERPINA6, SERPINA7, C8A, TSKU, 4931414P19RIK, JCHAIN, ADAMTSL1, ESM1, LGALS1, ADAMTSL2, LIPG, TNFSF10, HMCN2, PRSS8, LBP, CFAP43, IGHV3-6, LEFTY1, IZUMO4, IL1R1, COL25A1, CLEC11A, OMD, APOA4, SERPINA1E, PLA2G15, MMP12, IGHG2B, OLFM3, NGP, COL4A3, ANGPTL8, CHIL3, ACPP, S100A9, S100A8, TNFRSF22, LTF, HAMP2, NOTCH1, HTRA4…	0.0778948
GOTERM_CC_DIRECT	GO:0005829~cytosol	166	19.8091	0.00267144	RIPOR2, SERPINE2, WWC1, DIXDC1, IRS2, GM3839, HNMT, GIMAP8, BACH2, HERC2, LGALS1, STMN1, PIM3, KMT5A, KPNA2, CEP97, GLUL, SULT2A3, TSTD1, SFMBT2, TTC7B, ATG10, ACOT13, SCRIB, YOD1, CTPS, ACLY, RNF125, RALGAPB, GPD1, DDIT4, ACOT2, ACOT1, ORAI1, RAB38, ACOT6, STEAP2, S100A9, S100A8, OSBP2, FKBP5, BLM, PFKFB3, NNMT, NOTCH1, WNK4, PSEN2, GSTT2, AK6, FOXO1, ACACA, CD79B, NEU2, HSPH1, KLC2, PCBP4, DVL3…	0.176721
GOTERM_CC_DIRECT	GO:0016324~apical plasma membrane	26	3.10263	0.00269803	SLC23A2, RIPOR2, NOTCH1, ITGB3, SLC23A1, PSEN2, IL6RA, SLC2A5, EPCAM, CD36, GNAT1, SLC38A3, ABCB1A, PROM1, ABCG8, HSP90AA1, CYP4A31, CYP4A10, HIP1R, SCRIB, CYP4A14, USH2A, SLC6A9, SLC28A1, SHANK2, RAPGEF4	0.176721
GOTERM_CC_DIRECT	GO:0016020~membrane	250	29.8329	0.00484941	SLC23A2, TMEM41A, SERPINE2, SLC23A1, AQP8, D130043K22RIK, CYP3A11, CYP2D9, HERC2, STMN1, TNFSF10, CPNE2, PRSS8, PTGFRN, GNAT1, GLUL, MFSD2A, CDON, ARRDC4, IL1R1, ARRDC3, ACSL5, SCRIB, SYTL5, TMEM82, CYP39A1, TIAM2, RNF125, ORAI1, EPHA2, SLC45A3, GYPC, DCUN1D3, MGST3, ATP5K, WNK4, SLC5A3, CD79B, NEU2, GJC3, RDH11, RDH16, ATP6V0A2, ST3GAL6, PROM1, RAB11FIP4, IL11RA1, EDEM3, RCC2, SLC35E3, SLC16A11,…	0.282343
GOTERM_CC_DIRECT	GO:0005739~mitochondrion	81	9.66587	0.00572343	ALAS1, SLC44A1, ISOC2B, MPV17L, ECI3, NENF, GIMAP8, CYP2D9, AIFM3, MYC, SESN2, ME1, CD36, GLUL, TMEM14A, ACAD12, PDK1, HSP90AA1, PLA2G4F, PPTC7, TSTD1, ACOT13, ACSL5, SIRT5, GCAT, PLA2G15, ACLY, DDAH1, PDE12, EHHADH, GPD1, DDIT4, ACOT2, ACOT1, RAB38, SGK1, PLIN5, NDUFB9, GSTP1, ABHD8, ATP5K, DDX21, FOXK2, PROCA1, GRAMD4, ACACB, ACACA, CYP17A1, PRIMPOL, UNG, KLC2, ZFP13, ERBB4, STAP1, THEM7, VHL, …	0.299908
GOTERM_CC_DIRECT	GO:0043235~receptor complex	16	1.90931	0.00707139	NTRK2, ABCG8, NOTCH1, ITGB3, INSRR, IL6RA, GFRA1, VLDLR, ACVR2B, ERBB4, CD36, FGFR4, IL11RA1, IMPG2, FGFR1, EPHA2	0.336855
GOTERM_CC_DIRECT	GO:0009986~cell surface	38	4.53461	0.0107058	IGHM, NOTCH1, SUCNR1, PSG18, CLSTN3, ITGB3, PSEN2, SLC1A2, VLDLR, SLC2A4, TSPAN33, THBD, LGALS1, CDH1, EPCAM, LIPG, CD36, LBP, ABCB1A, PROM1, CDON, NTRK2, HSP90AA1, CD163, TNFRSF12A, CD93, SCARA5, IL1R1, SORT1, APOA4, F3, SORL1, RTN4RL1, CLEC2H, ITGA5, EPHA2, TNFRSF22, LTF	0.467488
GOTERM_CC_DIRECT	GO:0030054~cell junction	44	5.2506	0.0138177	CHRM1, CHRNA4, CLSTN3, ITGB3, KCNC3, FBF1, WNK4, DIXDC1, CYP46A1, TSPAN33, ARHGAP44, GJC3, GLRA3, CDH1, PPP1R13L, EPCAM, CHRNE, NACC1, XIRP1, HMCN2, SLC17A8, MFAP3L, DACT1, SVIL, NTRK2, GABBR2, DST, GRID1, SCRIB, NR1D1, SORCS2, TANC2, MYO1E, CPEB1, ARHGEF9, OLFM3, FABP5, DMXL2, SSPN, EPPK1, ITGA5, S100A9, SHANK2, EPHA2	0.530932
GOTERM_CC_DIRECT	GO:0071735~IgG immunoglobulin complex	3	0.357995	0.0141852	IGHG2B, IGHG1, IGKC	0.530932
GOTERM_CC_DIRECT	GO:0032991~macromolecular complex	42	5.01193	0.0236497	CDKN1A, BLM, CTDP1, CRYBG3, CHRNA4, CLSTN3, WWC1, GSTP1, ITGB3, SLC7A15, HMGB2, WNK4, PSEN2, DIXDC1, ATP2A2, IRS2, CHD4, HSPH1, KLC2, XPO1, MYC, STAP1, HES1, CD36, CEP97, GLUL, CEP76, PTPN1, GSTM2, HSP90AA1, IL1R1, CAD, ACVR2B, MYO1E, KRT18, ID2, PSMG3, ORAI1, HSPA1B, LTF, RAPGEF4, DGKH	0.800226
GOTERM_CC_DIRECT	GO:0045211~postsynaptic membrane	14	1.67064	0.0262201	GABBR2, CHRM1, CHRNA4, CLSTN3, GRID1, ITGB3, KCNC3, SCRIB, SORCS2, GLRA3, ERBB4, CHRNE, SSPN, SHANK2	0.800226
GOTERM_CC_DIRECT	GO:0014069~postsynaptic density	20	2.38663	0.0264775	NTRK2, CHRM1, DST, CLSTN3, IL1R1, HIP1R, SCRIB, ADCY1, SORCS2, ARHGAP44, DNAJB1, CPEB1, ARHGEF9, SLC6A9, FABP5, ERBB4, PDE4B, SHANK2, CAP2, RAPGEF4	0.800226
GOTERM_CC_DIRECT	GO:0043025~neuronal cell body	31	3.69928	0.0274887	SERPINE2, CHRNA4, PDE1A, AMIGO1, HDC, PSEN2, DIXDC1, CYP17A1, DNAJB1, ERBB4, ZFP385A, RAC3, GNAT1, SLC17A8, SLC38A2, NTRK2, DYNC1H1, NQO1, HSP90AA1, SORT1, CAD, HIP1R, NMNAT3, GFRA1, NR1D1, USH2A, SORL1, CPEB1, SHANK2, ZPR1, RAPGEF4	0.800226
GOTERM_CC_DIRECT	GO:0016323~basolateral plasma membrane	16	1.90931	0.0297674	SLC23A2, SLC13A3, HSP90AA1, SCRIB, SLC6A9, SLC22A27, CDH1, ERBB4, EPCAM, SLC22A28, SLCO1A1, SLC39A5, ORAI1, EPPK1, SLC38A3, RAPGEF4	0.813354
GOTERM_CC_DIRECT	GO:0005813~centrosome	27	3.22196	0.0320453	CTDP1, FBF1, PSEN2, TESK1, CHD4, HNMT, AK6, CDC14B, SENP5, TBC1D31, CSPP1, CEP70, PDE4B, CEP97, CEP76, LRRCC1, IQCB1, DYNC1H1, CCDC14, USP2, TUBG1, CABCOCO1, CPEB1, ID1, CEP85, DZIP1, HSPA1B	0.813354
GOTERM_CC_DIRECT	GO:0071944~cell periphery	8	0.954654	0.0333286	NOTCH1, KRT18, CDH1, PDE4B, RAC3, EPPK1, INHBB, CD36	0.813354
GOTERM_CC_DIRECT	GO:0048471~perinuclear region of cytoplasm	37	4.41527	0.0341484	IGHM, CDKN1A, WWC1, DCUN1D3, HMGB2, PSEN2, TESK1, PTPRM, ATP2A2, VLDLR, SLC2A4, SLC5A3, TMEM100, RASD1, CDH1, MYC, PDE4B, ATP6V0A2, RAC3, UNC45A, NTRK2, HSP90AA1, DST, SORT1, RHBDD2, USP2, HIP1R, INHBB, RANGAP1, SORL1, BYSL, CPEB1, SEC23IP, SGK1, HSPA1B, ZPR1, FGFR1	0.813354
GOTERM_CC_DIRECT	GO:0099056~integral component of presynaptic membrane	8	0.954654	0.0367179	GABBR2, CHRM1, SLC6A9, ERBB4, CHRNA4, KCNC3, PSEN2, SLC1A2	0.836529
GOTERM_CC_DIRECT	GO:0005771~multivesicular body	6	0.71599	0.0407116	GFRA1, SLC2A4, SLC17A8, SFTPA1, ACPP, SORL1	0.888871
GOTERM_CC_DIRECT	GO:0036464~cytoplasmic ribonucleoprotein granule	7	0.835322	0.0507557	ZC3H12D, SERPINB1A, TSTD1, AGO2, BLNK, LIG4, SHB	0.992424
GOTERM_CC_DIRECT	GO:0005856~cytoskeleton	56	6.68258	0.0588311	FHOD3, RIPOR2, KCNC3, DIXDC1, TESK1, HSPB1, KRT23, CHD4, HERC2, PSTPIP2, CSPP1, FAM110C, STMN1, RAC3, CEP97, CFAP43, LRRCC1, IQCB1, MYLIP, GAS2L3, DST, ACOT13, TUBG1, RANGAP1, PSPC1, ODF3B, CFAP54, S100A9, S100A8, DGKH, TEDC2, CTDP1, NOTCH1, FBF1, CAMSAP1, KLC2, CEP70, GAS2L1, CEP76, SVIL, DYNC1H1, CCDC14, RCC2, HIP1R, DHCR24, CABCOCO1, MYO1E, KRT18, TTLL4, KIF26B, EPPK1, CEP85, DZIP1, KBTBD8, TU…	0.992424
GOTERM_CC_DIRECT	GO:0009897~external side of plasma membrane	31	3.69928	0.0593224	IGHM, CHRNA4, IGHV1-42, ITGB3, IL6RA, SLC2A4, IGHV1-26, CD79B, THBD, IGHG1, IGKC, CD36, IGHV1-9, IGHV3-6, IL11RA1, CD276, CD163, SCARA5, IL1R1, IGHV1-53, GFRA1, MR1, RAET1D, IGHG2B, IGHG2C, KRT18, RAET1E, RTN4RL1, CLEC2H, ITGA5, TNFRSF22	0.992424
GOTERM_CC_DIRECT	GO:0044214~spanning component of plasma membrane	3	0.357995	0.0636032	RAET1D, RAET1E, ERBB4	0.992424
GOTERM_CC_DIRECT	GO:0046658~anchored component of plasma membrane	5	0.596659	0.0719129	RAET1D, EEPD1, RAET1E, RTN4RL1, PRSS8	0.992424
GOTERM_CC_DIRECT	GO:0001917~photoreceptor inner segment	6	0.71599	0.0816772	GNGT1, RDH11, GNAT1, USH2A, SHANK2, RAPGEF4	0.992424
GOTERM_CC_DIRECT	GO:0005634~nucleus	225	26.8496	0.0845305	IPO13, JRK, DQX1, ISOC2B, TESK1, ZFP608, BACH2, ZC3H12D, HERC2, LGALS1, MYC, FAM110C, CPNE2, ZFP960, SOX7, NKX2-6, IL1R1, SFMBT2, CIRBP, SOX12, GCAT, RFX4, BCORL1, ZFPM1, TSPYL4, L3MBTL2, PDE1A, DCUN1D3, DCUN1D4, NOLC1, HSPH1, MRNIP, PCBP4, HEXIM1, GADD45B, TIPARP, GADD45A, ZFR2, RCC2, SETD1A, PBX3, DCLK3, MICAL2, NR1D1, BTBD10, SRPK1, TADA2B, CPEB1, NPLOC4, ID2, ID1, AGO2, ID4, ID3, MPHOSPH10, N…	0.992424
GOTERM_CC_DIRECT	GO:0005759~mitochondrial matrix	13	1.55131	0.0863748	PTPN1, ALAS1, PPTC7, MTERF2, ACOT13, SIRT5, MTHFS, MTERF1A, PRIMPOL, PDE12, ACOT2, HSPA1B, PDK1	0.992424
GOTERM_CC_DIRECT	GO:0045177~apical part of cell	9	1.07399	0.090413	SPECC1, CDH1, AQP8, VLDLR, CD36, TUBG1, ACPP, ABCB1A, BYSL	0.992424
GOTERM_CC_DIRECT	GO:1990030~pericellular basket	2	0.238663	0.0933188	AMIGO1, SLC17A8	0.992424
GOTERM_CC_DIRECT	GO:0071756~pentameric IgM immunoglobulin complex	2	0.238663	0.0933188	IGHM, JCHAIN	0.992424
GOTERM_CC_DIRECT	GO:0042995~cell projection	47	5.60859	0.0941126	RIPOR2, TEDC2, CLSTN3, WWC1, AMIGO1, ITGB3, KCNC3, TESK1, TPTE, CYP46A1, CYP17A1, ARHGAP44, GLRA3, ZFP385A, RAC3, NEK3, GNAT1, CFAP43, PROM1, GLUL, IMPG2, SVIL, NTRK2, DST, SPRY4, CAD, SCRIB, NR1D1, CABCOCO1, USH2A, SORCS2, TANC2, BYSL, TIAM2, TTLL4, BBS10, TTC30B, TMEM237, RTN4RL1, BBS12, EPPK1, DZIP1, CFAP54, SHANK2, EPHA2, ZPR1, TTLL8	0.992424
GOTERM_CC_DIRECT	GO:0043204~perikaryon	12	1.43198	0.0974616	TMEM100, TIAM2, NTRK2, GLRA3, RTN4RL1, AMIGO1, KCNC3, HSPB1, SLC17A8, SORCS2, GLUL, ZPR1	0.992424
GOTERM_CC_DIRECT	GO:0032587~ruffle membrane	7	0.835322	0.0993422	PLA2G4F, ITGB3, WWC1, SPRY4, HIP1R, ITGA5, EPHA2	0.992424
	MF	Count	%	PValue	Genes
GOTERM_MF_DIRECT	GO:0052689~carboxylic ester hydrolase activity	12	1.43198	3.33e-05	CES2C, CES2E, CES1E, ABHD2, LIPG, CES2H, ABHD8, ACOT2, ACOT1, PNPLA6, ACOT6, MGLL	0.0181081
GOTERM_MF_DIRECT	GO:0016491~oxidoreductase activity	42	5.01193	3.73e-05	RDH9, MGST3, HAAO, CYP3A11, CYP46A1, CYP7A1, CYP17A1, AIFM3, CYP2D9, RDH11, DHRS7B, SESN2, ME1, RDH16, SC5D, SCD1, HAO2, KDM6B, NQO1, RNLS, ADHFE1, CYP4A10, SQOR, CYP3A44, MICAL2, DHCR24, CYP4A14, FMO5, CYP39A1, QDPR, BDH2, DCT, P4HA2, FASN, EHHADH, GPD1, CYP3A41B, CRYL1, MSRB3, DUS1L, STEAP2, ALDH1A7	0.0181081
GOTERM_MF_DIRECT	GO:0015293~symporter activity	14	1.67064	0.000162	SLC23A2, SLC12A4, SLC13A3, SLC23A1, SLC1A2, SLC16A11, SLC5A3, SLC6A9, SLC17A8, SLC38A3, SLC38A2, SLC28A1, SLC15A5, MFSD2A	0.0521063
GOTERM_MF_DIRECT	GO:0005506~iron ion binding	18	2.14797	0.000215	CYP4A31, HAAO, CYP4A10, CYP3A44, CYP3A11, CYP4A14, CYP46A1, CYP7A1, CYP17A1, CYP39A1, CYP2D9, CYP2A4, P4HA2, CYP3A41B, SC5D, SCD1, CYP2G1, LTF	0.0521063
GOTERM_MF_DIRECT	GO:0022857~transmembrane transporter activity	19	2.2673	0.000478	SLC23A2, SLC44A3, SLC12A4, SLC13A3, SLC45A3, SLC44A1, SLC23A1, SPNS2, SLC16A11, SLC2A4, SLC2A5, SLC5A3, MFSD7A, SLC22A27, SLC22A28, SLCO1A1, SLC17A8, ABCB1A, SLC15A5	0.0928006
GOTERM_MF_DIRECT	GO:0004364~glutathione transferase activity	7	0.835322	0.000702	GSTM4, GSTM2, GSTA4, GSTP1, GSTA2, MGST3, GSTT2	0.113543
GOTERM_MF_DIRECT	GO:0047617~acyl-CoA hydrolase activity	6	0.71599	0.000842	ACOT2, ACOT1, ACOT13, THEM7, ACNAT2, ACOT6	0.116713
GOTERM_MF_DIRECT	GO:0046872~metal ion binding	151	18.0191	0.00138426	RFESD, CYP3A11, TESK1, ZFP608, CYP46A1, ZC3H12D, CYP2D9, HERC2, CDH1, LIPG, TNFSF10, CPNE2, GNAT1, NEK3, MAP3K6, ZFP960, GLUL, 4930522L14RIK, MYLIP, ABCG8, PPTC7, USP2, LIG4, YOD1, SYTL5, PLA2G15, PYGO1, CYP39A1, ACLY, RNF125, PDE12, PGP, ADPRM, ZFP9, STEAP2, ZFPM1, S100A9, S100A8, DGKH, BLM, L3MBTL2, NOTCH1, PDE1A, ZFP229, SLC1A2, ACACB, ACACA, ZMAT3, PCK1, RAB11FIP4, EDEM3, ZFHX2, TIPARP, ADHFE…	0.15247
GOTERM_MF_DIRECT	GO:0008395~steroid hydroxylase activity	9	1.07399	0.00141467	CYP39A1, CYP2D9, CYP2A4, CYP3A41B, CYP3A44, CYP3A11, CYP46A1, CYP7A1, CYP2G1	0.15247
GOTERM_MF_DIRECT	GO:0004497~monooxygenase activity	12	1.43198	0.00176975	CYP39A1, CYP2D9, CYP4A10, CYP3A41B, CYP3A44, CYP3A11, MICAL2, CYP4A14, CYP46A1, CYP7A1, FMO5, CYP17A1	0.171666
GOTERM_MF_DIRECT	GO:0016705~oxidoreductase activity, acting on paired donors, with incorporation or reduction of molecular oxygen	10	1.19332	0.00250048	CYP39A1, CYP2D9, P4HA2, CYP4A10, CYP3A41B, CYP3A11, CYP4A14, CYP46A1, CYP7A1, CYP17A1	0.220497
GOTERM_MF_DIRECT	GO:0005504~fatty acid binding	7	0.835322	0.00509663	FABP5, GSTA4, GSTP1, GSTA2, CYP4A14, AFP, UGT1A9	0.411978
GOTERM_MF_DIRECT	GO:0004867~serine-type endopeptidase inhibitor activity	12	1.43198	0.00571996	SERPINB1A, SERPINE2, MUG1, TFPI2, SERPINA3K, SERPINB9, A2ML1, SERPINA9, SERPINA1E, SERPINA6, SERPINB8, SERPINA7	0.426797
GOTERM_MF_DIRECT	GO:0016874~ligase activity	12	1.43198	0.00709067	ACSS2, TTLL4, CAD, ADSSL1, LIG4, ACSL5, MTHFS, CTPS, ACACB, GLUL, ACACA, TTLL8	0.491282
GOTERM_MF_DIRECT	GO:0008170~N-methyltransferase activity	3	0.357995	0.0104553	NNMT, HNMT, INMT	0.645614
GOTERM_MF_DIRECT	GO:0020037~heme binding	14	1.67064	0.0108348	CYP4A31, CYP4A10, CYP3A44, CYP3A11, CYP4A14, NR1D1, CYP46A1, CYP7A1, CYP17A1, CYP39A1, CYP2D9, CYP2A4, CYP3A41B, CYP2G1	0.645614
GOTERM_MF_DIRECT	GO:0004602~glutathione peroxidase activity	5	0.596659	0.0118238	GSTA4, GSTP1, GSTA2, MGST3, GSTT2	0.645614
GOTERM_MF_DIRECT	GO:0005215~transporter activity	4	0.477327	0.012567	SLC23A2, SLC23A1, SPNS2, MFSD2A	0.645614
GOTERM_MF_DIRECT	GO:0070330~aromatase activity	6	0.71599	0.0126461	CYP2D9, CYP2A4, CYP3A41B, CYP3A44, CYP3A11, CYP2G1	0.645614
GOTERM_MF_DIRECT	GO:0070888~E-box binding	6	0.71599	0.0182828	TFAP4, MYC, BHLHE41, HES1, NR1D1, ARNTL	0.886717
GOTERM_MF_DIRECT	GO:0016790~thiolester hydrolase activity	4	0.477327	0.0209263	ACOT2, ACOT1, ACNAT2, ACOT6	0.966598
GOTERM_MF_DIRECT	GO:0016290~palmitoyl-CoA hydrolase activity	4	0.477327	0.0242453	CES1E, ACOT2, ACOT1, ACOT13	0.98385
GOTERM_MF_DIRECT	GO:0030414~peptidase inhibitor activity	10	1.19332	0.0257815	SERPINB1A, SERPINE2, NGP, MUG1, TFPI2, SERPINA3K, A2ML1, SERPINA9, SERPINA1E, SERPINB8	0.98385
GOTERM_MF_DIRECT	GO:0102116~laurate hydroxylase activity	3	0.357995	0.0273855	CYP4A31, CYP4A10, CYP4A14	0.98385
GOTERM_MF_DIRECT	GO:0103002~16-hydroxypalmitate dehydrogenase activity	3	0.357995	0.0273855	CYP4A31, CYP4A10, CYP4A14	0.98385
GOTERM_MF_DIRECT	GO:0015636~short-chain fatty acid uptake transporter activity	3	0.357995	0.0273855	SLC22A27, SLC22A28, CD36	0.98385
GOTERM_MF_DIRECT	GO:0047376~all-trans-retinyl-palmitate hydrolase, all-trans-retinol forming activity	3	0.357995	0.0273855	CES2C, CES2E, CES1E	0.98385
GOTERM_MF_DIRECT	GO:0001046~core promoter sequence-specific DNA binding	4	0.477327	0.0316825	MMP12, KLF10, MYC, AGO2	0.994872
GOTERM_MF_DIRECT	GO:0050649~testosterone 6-beta-hydroxylase activity	3	0.357995	0.0344401	CYP3A41B, CYP3A44, CYP3A11	0.994872
GOTERM_MF_DIRECT	GO:0004300~enoyl-CoA hydratase activity	3	0.357995	0.0421117	EHHADH, ECHDC1, TUBA8	0.994872
GOTERM_MF_DIRECT	GO:0004806~triglyceride lipase activity	4	0.477327	0.044805	PLA2G15, ABHD2, LIPG, PNPLA5	0.994872
GOTERM_MF_DIRECT	GO:0005515~protein binding	199	23.747	0.0478885	DIXDC1, HSF2BP, BACH2, TSKU, LGALS1, CSPP1, MYC, RASSF6, STMN1, PTGFRN, GNAT1, GLUL, CDON, IL1R1, ATG10, SCRIB, SYTL5, TIAM2, RFX4, ORAI1, ZFPM1, EPHA2, L3MBTL2, FBF1, WNK4, NOLC1, SLC5A3, CD79B, HSPH1, ATP6V0A2, HEXIM1, GSTM2, GADD45B, GADD45A, SETD1A, PBX3, DCLK3, NR1D1, GDF3, BTBD10, SRPK1, RAET1D, TADA2B, CPEB1, ID2, ID1, AGO2, ID4, PSMG3, ID3, DZIP1, IGHM, CDKN1A, PPP1R10, SLC7A15, BHLHE41, …	0.994872
GOTERM_MF_DIRECT	GO:0016787~hydrolase activity	67	7.99523	0.0489987	DQX1, PTPRM, CHD4, CDC14B, ANKRD9, ZC3H12D, CES2C, SENP5, CES2E, LIPG, RAC3, PRSS8, HSP90AA1, PLA2G4F, G6PC, PPTC7, IL1R1, DUSP1, USP2, CAD, ACOT13, YOD1, GPCPD1, CDC25A, PLA2G15, MMP12, RAP2A, DDAH1, MMP15, PDE12, ASPG, PGP, ACOT2, ACOT1, CHIL3, RAD54L2, ADPRM, ACOT6, ACPP, MGLL, LTF, BLM, CTDP1, PDE1A, ABHD2, HTRA4, TMPRSS4, ABHD8, PSEN2, DDX21, PPM1G, UNG, NEU2, RBBP8, EDEM3, PTPN1, PNKD, BMP1…	0.994872
GOTERM_MF_DIRECT	GO:0032451~demethylase activity	3	0.357995	0.0503511	CYP3A41B, CYP3A44, CYP3A11	0.994872
GOTERM_MF_DIRECT	GO:0061629~RNA polymerase II sequence-specific DNA binding transcription factor binding	13	1.55131	0.0560353	SETD1A, BHLHE41, HSPB1, CHD4, HIPK2, BBS10, ID2, ID4, RBBP8, HES1, ANKRD2, ZFPM1, DACT1	0.994872
GOTERM_MF_DIRECT	GO:0004725~protein tyrosine phosphatase activity	8	0.954654	0.057554	PTPN1, DUSP1, PGP, PTPRM, TPTE, ACPP, CDC25A, CDC14B	0.994872
GOTERM_MF_DIRECT	GO:0050051~leukotriene-B4 20-monooxygenase activity	3	0.357995	0.0591119	CYP4A31, CYP4A10, CYP4A14	0.994872
GOTERM_MF_DIRECT	GO:0018685~alkane 1-monooxygenase activity	3	0.357995	0.0591119	CYP4A31, CYP4A10, CYP4A14	0.994872
GOTERM_MF_DIRECT	GO:0015229~L-ascorbic acid transporter activity	2	0.238663	0.0658152	SLC23A2, SLC23A1	0.994872
GOTERM_MF_DIRECT	GO:0097690~iron channel inhibitor activity	2	0.238663	0.0658152	HAMP2, HAMP	0.994872
GOTERM_MF_DIRECT	GO:0008520~L-ascorbate:sodium symporter activity	2	0.238663	0.0658152	SLC23A2, SLC23A1	0.994872
GOTERM_MF_DIRECT	GO:0030145~manganese ion binding	6	0.71599	0.0697752	XPNPEP3, ME1, PCK1, ADPRM, GLUL, PRIMPOL	0.994872
GOTERM_MF_DIRECT	GO:0005044~scavenger receptor activity	5	0.596659	0.0715941	CD163, SCARA5, TMPRSS4, SSC4D, CD36	0.994872
GOTERM_MF_DIRECT	GO:0008392~arachidonic acid epoxygenase activity	5	0.596659	0.0761357	CYP2A4, CYP4A31, CYP4A10, CYP4A14, CYP2G1	0.994872
GOTERM_MF_DIRECT	GO:0042826~histone deacetylase binding	9	1.07399	0.0838127	HSP90AA1, TFAP4, BHLHE41, HES1, CHD4, KPNA2, HSPA1B, SMG5, DACT1	0.994872
GOTERM_MF_DIRECT	GO:0102033~cytochrome P450 fatty acid omega-hydroxylase activity	3	0.357995	0.0880945	CYP4A31, CYP4A10, CYP4A14	0.994872
GOTERM_MF_DIRECT	GO:0016829~lyase activity	10	1.19332	0.0892492	GSTM4, CAR3, CAR1, EHHADH, HDC, FASN, ECHDC1, ADCY1, PCK1, CYP17A1	0.994872
GOTERM_MF_DIRECT	GO:0003823~antigen binding	12	1.43198	0.0955714	IGHG2B, IGHM, MFAP4, IGHG2C, IGHG1, IGKC, IGHV1-53, IGHV1-42, IGHV1-9, IGHV1-26, IGHV3-6, JCHAIN	0.994872
GOTERM_MF_DIRECT	GO:0033782~24-hydroxycholesterol 7alpha-hydroxylase activity	2	0.238663	0.0970827	CYP39A1, CYP7A1	0.994872
GOTERM_MF_DIRECT	GO:0045569~TRAIL binding	2	0.238663	0.0970827	TNFSF10, TNFRSF22	0.994872
GOTERM_MF_DIRECT	GO:0003989~acetyl-CoA carboxylase activity	2	0.238663	0.0970827	ACACB, ACACA	0.994872
GOTERM_MF_DIRECT	GO:0001227~transcriptional repressor activity, RNA polymerase II transcription regulatory region sequence-specific binding	18	2.14797	0.0972533	AU041133, ZFP763, BHLHE41, FOXK2, 2610008E11RIK, ZBTB45, NR1D1, ZFP955B, FOXO1, KLF16, BACH2, FOXQ1, ZFP78, ZFP13, MYC, ZFP131, HES1, ZFP9	0.994872
GOTERM_MF_DIRECT	GO:0070403~NAD+ binding	3	0.357995	0.098524	EHHADH, CRYL1, SIRT5	0.994872
GOTERM_MF_DIRECT	GO:0102991~myristoyl-CoA hydrolase activity	3	0.357995	0.098524	ACOT2, ACOT1, ACOT13	0.994872
GOTERM_MF_DIRECT	GO:0008391~arachidonic acid monooxygenase activity	3	0.357995	0.098524	CYP4A31, CYP4A10, CYP4A14	0.994872
GOTERM_MF_DIRECT	GO:0008432~JUN kinase binding	3	0.357995	0.098524	GSTP1, HES1, LMNB1	0.994872
