# Supplementary material for: Hepatic Transcriptomics Reveals Reduced Lipogenesis in High-Salt Diet Mice
Source: Genes (Basel). 2023 Apr 24;14(5):966. doi: 10.3390/genes14050966 (PMC10218062; doi:10.3390/genes14050966)
Supplement: Supplementary file 1 [file genes-14-00966-s001.zip › Supplementary Tables S4_KEGG pathways of DEGs in liver.xlsx]

## Sheet: GO terms of DEGs in liver
Table S4. KEGG pathways of DEGs in liver
	KEGG	Count	%	PValue	Genes
KEGG_PATHWAY	mmu01100:Metabolic pathways	93	11.0979	1.06e-06	COLGALT2, ALAS1, RDH9, CYP3A11, HNMT, LIPG, PDE4B, ME1, SCD1, KMT5A, NAT8F7, GLUL, PLA2G4F, G6PC, CYP4A10, CAD, CYP3A44, ACSL5, SIRT5, CYP4A14, CTPS, GCAT, INMT, ACLY, DCT, CYP2A4, EHHADH, CYP3A41B, PGP, ADSSL1, ACOT2, ACOT1, ADPRM, ALDH1A7, MGLL, DGKH, NDUFB9, PFKFB3, NNMT, GALT, ACSS2, PDE1A, MGST3, GSTP1, HDC, HAAO, ATP5K, GSTT2, ADCY1, ACNAT2, AK6, CYP7A1, ACACB, PAPSS2, ACACA, TYMP, CYP17A1,…	0.000178
KEGG_PATHWAY	mmu05204:Chemical carcinogenesis - DNA adducts	15	1.78998	1.3e-06	GSTM4, GSTM2, MGST3, GSTP1, UGT2B37, CYP3A44, CYP3A11, GSTT2, GSTA4, GSTA2, CYP3A41B, UGT1A5, SULT2A7, UGT1A9, SULT2A3	0.000178
KEGG_PATHWAY	mmu00983:Drug metabolism - other enzymes	15	1.78998	4e-06	GSTM4, GSTM2, MGST3, GSTP1, UGT2B37, GSTT2, TYMP, CES2C, GSTA4, CES2E, CES1E, GSTA2, CES2H, UGT1A5, UGT1A9	0.000365
KEGG_PATHWAY	mmu03320:PPAR signaling pathway	14	1.67064	1.4e-05	CYP4A31, CYP4A10, ACSL5, CYP4A14, CYP7A1, FABP5, EHHADH, PLIN4, ME1, PLIN2, CD36, SCD1, PCK1, PLIN5	0.00096
KEGG_PATHWAY	mmu00830:Retinol metabolism	14	1.67064	3.6e-05	RDH9, CYP4A31, CYP4A10, UGT2B37, CYP3A44, CYP3A11, CYP4A14, CYP2A4, RDH11, CYP3A41B, RDH16, UGT1A5, UGT1A9, ALDH1A7	0.0019719
KEGG_PATHWAY	mmu00980:Metabolism of xenobiotics by cytochrome P450	12	1.43198	4.8e-05	GSTM4, GSTM2, GSTA4, GSTP1, GSTA2, MGST3, UGT2B37, UGT1A5, SULT2A7, GSTT2, UGT1A9, SULT2A3	0.0021915
KEGG_PATHWAY	mmu00982:Drug metabolism - cytochrome P450	11	1.31265	0.000189	GSTM4, GSTM2, GSTA4, GSTP1, GSTA2, MGST3, UGT2B37, UGT1A5, GSTT2, UGT1A9, FMO5	0.00739063
KEGG_PATHWAY	mmu05418:Fluid shear stress and atherosclerosis	15	1.78998	0.000726	GSTM4, NQO1, GSTM2, HSP90AA1, IL1R1, DUSP1, ITGB3, MGST3, GSTP1, GSTT2, ACVR2B, THBD, GSTA4, GSTA2, RAC3	0.0247697
KEGG_PATHWAY	mmu04976:Bile secretion	12	1.43198	0.000814	ABCG8, SLCO1A1, AQP8, UGT2B37, UGT1A5, SULT2A7, ADCY1, ACNAT2, UGT1A9, ABCB1A, CYP7A1, SULT2A3	0.0247697
KEGG_PATHWAY	mmu04979:Cholesterol metabolism	8	0.954654	0.00180553	MYLIP, ABCG8, SORT1, ANGPTL8, LIPG, APOA4, CD36, CYP7A1	0.0485233
KEGG_PATHWAY	mmu04350:TGF-beta signaling pathway	11	1.31265	0.00194801	LEFTY1, HAMP2, MYC, ID2, ID1, ID4, ID3, INHBB, INHBC, ACVR2B, HAMP	0.0485233
KEGG_PATHWAY	mmu05207:Chemical carcinogenesis - receptor activation	18	2.14797	0.00273075	GSTM4, GSTM2, HSP90AA1, CHRNA4, MGST3, UGT2B37, CYP3A44, CYP3A11, GSTT2, ADCY1, CDC25A, GSTA4, GSTA2, MYC, CYP3A41B, UGT1A5, UGT1A9, KPNA2	0.062352
KEGG_PATHWAY	mmu04550:Signaling pathways regulating pluripotency of stem cells	13	1.55131	0.00412604	PCGF6, LEFTY1, INHBB, INHBC, ACVR2B, MYC, ID2, ID1, ID4, DVL3, ID3, FGFR4, FGFR1	0.0869641
KEGG_PATHWAY	mmu04152:AMPK signaling pathway	12	1.43198	0.00547495	PFKFB3, G6PC, FASN, IRS2, SLC2A4, SCD1, CD36, PCK1, ACACB, ACACA, FOXO1, PRKAG3	0.107153
KEGG_PATHWAY	mmu04710:Circadian rhythm	6	0.71599	0.00656957	DBP, PER3, BHLHE41, NR1D1, PRKAG3, ARNTL	0.118018
KEGG_PATHWAY	mmu04068:FoxO signaling pathway	12	1.43198	0.00689154	CDKN1A, G6PC, GADD45B, GADD45A, TNFSF10, IRS2, SLC2A4, PCK1, SGK1, SGK2, FOXO1, PRKAG3	0.118018
KEGG_PATHWAY	mmu05225:Hepatocellular carcinoma	14	1.67064	0.00909857	GSTM4, NQO1, GSTM2, CDKN1A, GADD45B, GADD45A, MGST3, GSTP1, GSTT2, GSTA4, GSTA2, MYC, DVL3, E2F3	0.146648
KEGG_PATHWAY	mmu04920:Adipocytokine signaling pathway	8	0.954654	0.0127693	G6PC, ACSL5, IRS2, SLC2A4, CD36, PCK1, ACACB, PRKAG3	0.194378
KEGG_PATHWAY	mmu00480:Glutathione metabolism	8	0.954654	0.0137275	GSTM4, GSTM2, GSTA4, GSTP1, GSTA2, MGST3, GSTT2, NAT8F7	0.197966
KEGG_PATHWAY	mmu00140:Steroid hormone biosynthesis	9	1.07399	0.016386	CYP2D9, UGT2B37, CYP3A41B, CYP3A44, UGT1A5, CYP3A11, UGT1A9, CYP7A1, CYP17A1	0.224489
KEGG_PATHWAY	mmu01240:Biosynthesis of cofactors	12	1.43198	0.019558	NQO1, ALAS1, RDH11, HAAO, UGT2B37, CAD, UGT1A5, ADSSL1, NMNAT3, CTPS, UGT1A9, AK6	0.255186
KEGG_PATHWAY	mmu00640:Propanoate metabolism	5	0.596659	0.0231662	ACSS2, EHHADH, ECHDC1, ACACB, ACACA	0.277789
KEGG_PATHWAY	mmu01524:Platinum drug resistance	8	0.954654	0.0233181	GSTM4, CDKN1A, GSTM2, GSTA4, GSTP1, GSTA2, MGST3, GSTT2	0.277789
KEGG_PATHWAY	mmu00120:Primary bile acid biosynthesis	4	0.477327	0.02446	CYP39A1, ACNAT2, CYP46A1, CYP7A1	0.279252
KEGG_PATHWAY	mmu00630:Glyoxylate and dicarboxylate metabolism	5	0.596659	0.025756	ACSS2, PGP, HYI, GLUL, HAO2	0.282286
KEGG_PATHWAY	mmu00061:Fatty acid biosynthesis	4	0.477327	0.0282993	FASN, ACSL5, ACACB, ACACA	0.298231
KEGG_PATHWAY	mmu05200:Pathways in cancer	29	3.46062	0.0299467	CDKN1A, NOTCH1, LAMC3, MGST3, GSTP1, GSTT2, IL6RA, ADCY1, FOXO1, GNGT1, CDH1, MYC, RAC3, DVL3, HES1, E2F3, VHL, GSTM4, NQO1, GSTM2, HSP90AA1, GADD45B, GADD45A, GSTA4, LPAR6, GSTA2, COL4A3, FGFR4, FGFR1	0.303903
KEGG_PATHWAY	mmu04151:PI3K-Akt signaling pathway	21	2.50597	0.0311358	NTRK2, CDKN1A, HSP90AA1, G6PC, CHRM1, LAMC3, ITGB3, IL6RA, GNGT1, LPAR6, ERBB4, MYC, DDIT4, COL4A3, ITGA5, PCK1, SGK1, FGFR4, SGK2, FGFR1, EPHA2	0.304686
KEGG_PATHWAY	mmu05146:Amoebiasis	9	1.07399	0.0365181	IL1R1, LAMC3, COL4A3, HSPB1, SERPINB9, CXCL1, ADCY1, C8B, C8A	0.33469
KEGG_PATHWAY	mmu00071:Fatty acid degradation	6	0.71599	0.0366449	CYP4A31, EHHADH, CYP4A10, ECI3, ACSL5, CYP4A14	0.33469
KEGG_PATHWAY	mmu05216:Thyroid cancer	5	0.596659	0.0412393	CDKN1A, GADD45B, CDH1, GADD45A, MYC	0.359246
KEGG_PATHWAY	mmu04931:Insulin resistance	9	1.07399	0.0419557	PTPN1, G6PC, IRS2, SLC2A4, CD36, PCK1, ACACB, FOXO1, PRKAG3	0.359246
KEGG_PATHWAY	mmu04724:Glutamatergic synapse	9	1.07399	0.0479056	GNGT1, PLA2G4F, SLC1A2, SLC17A8, ADCY1, SLC38A3, SLC38A2, GLUL, SHANK2	0.397762
KEGG_PATHWAY	mmu05219:Bladder cancer	5	0.596659	0.0567012	CDKN1A, CDH1, MYC, E2F3, TYMP	0.454019
KEGG_PATHWAY	mmu04910:Insulin signaling pathway	10	1.19332	0.0595056	PTPN1, G6PC, FASN, IRS2, SLC2A4, PCK1, ACACB, ACACA, FOXO1, PRKAG3	0.454019
KEGG_PATHWAY	mmu00564:Glycerophospholipid metabolism	8	0.954654	0.0596521	PLA2G15, PLA2G4F, GPAM, GPD1, PNPLA6, GPCPD1, ADPRM, DGKH	0.454019
KEGG_PATHWAY	mmu00620:Pyruvate metabolism	5	0.596659	0.0700682	ACSS2, ME1, PCK1, ACACB, ACACA	0.518884
