# Supplementary figures and images for: Hepatic Transcriptomics Reveals Reduced Lipogenesis in High-Salt Diet Mice
Source: MDPI journal article supplement (doi:10.3390/genes14050966), 2023-04-24

PCA 3D figure

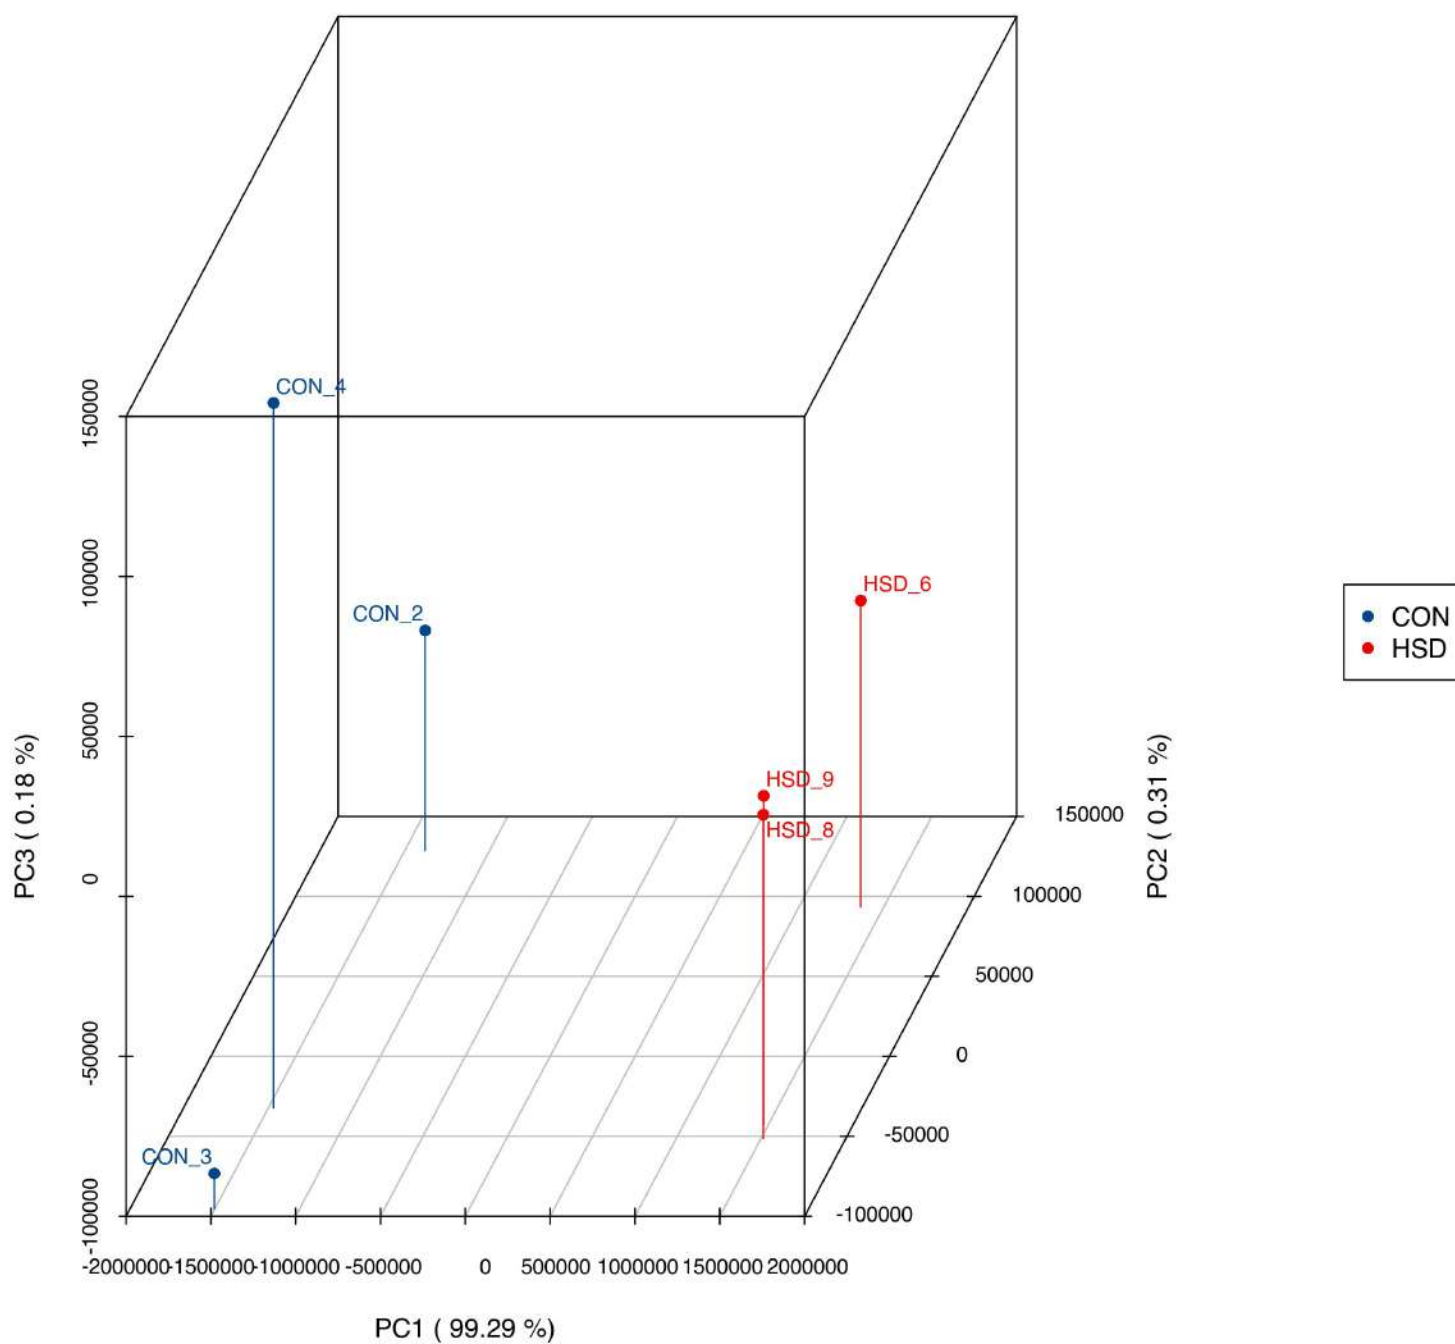

Supplement: s1 [file s1]

A

## GO analysis of up-regulated DEGs

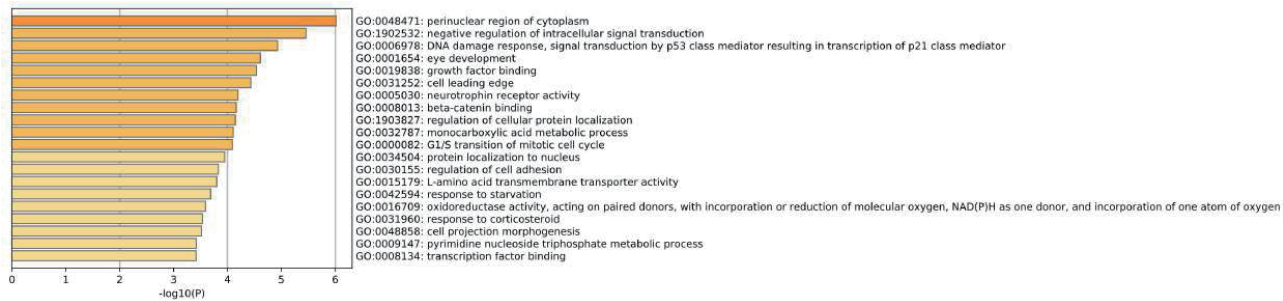

B

## GO analysis of down-regulated DEGs

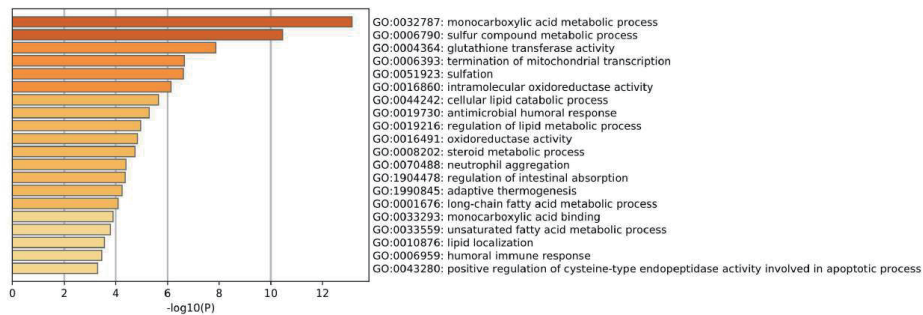

Supplement: s1 [file s1]

## A PPAR signaling pathway

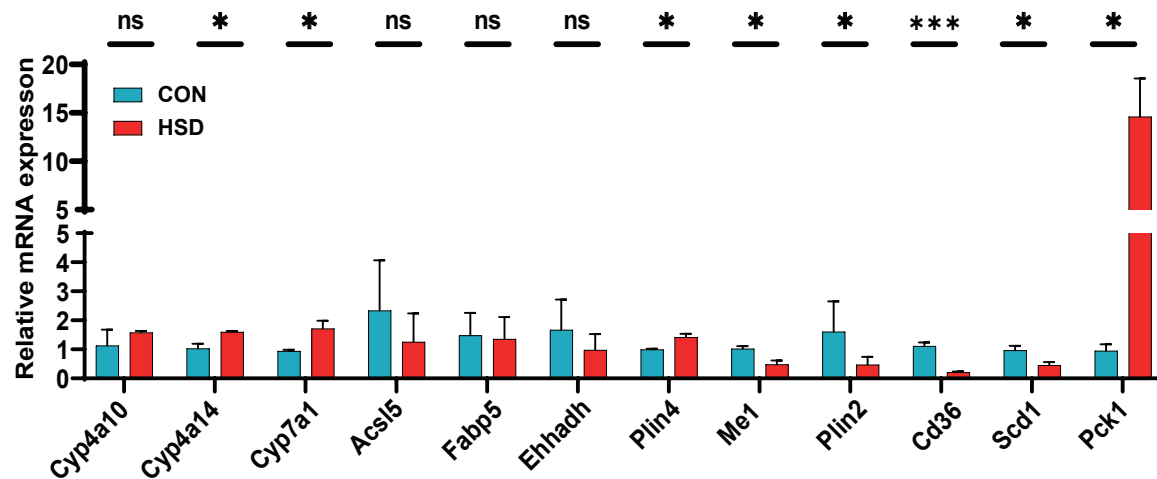

## C Bile secretion

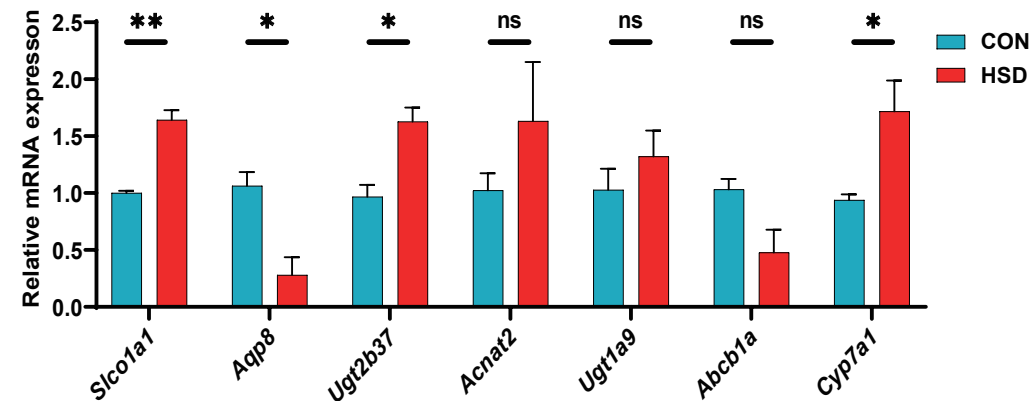

## B Retinol metabolism

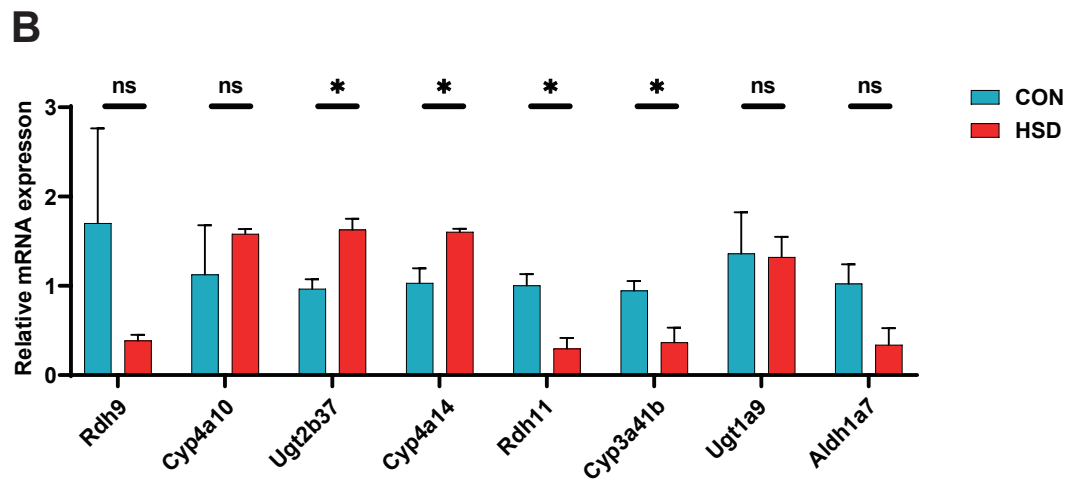

## D Cholesterol metabolism

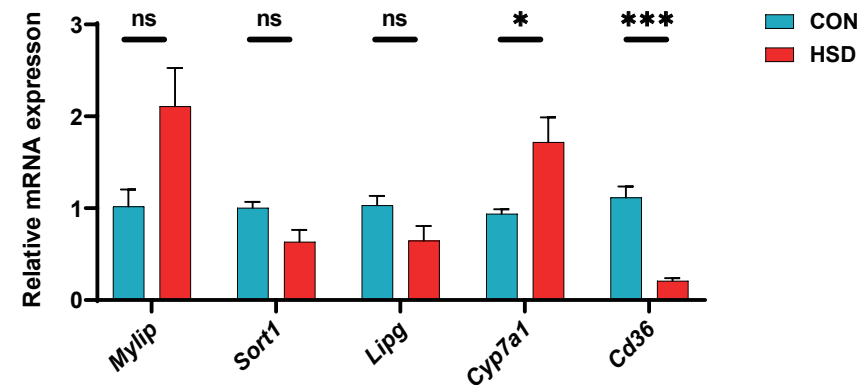

Supplement: s1 [file s1]

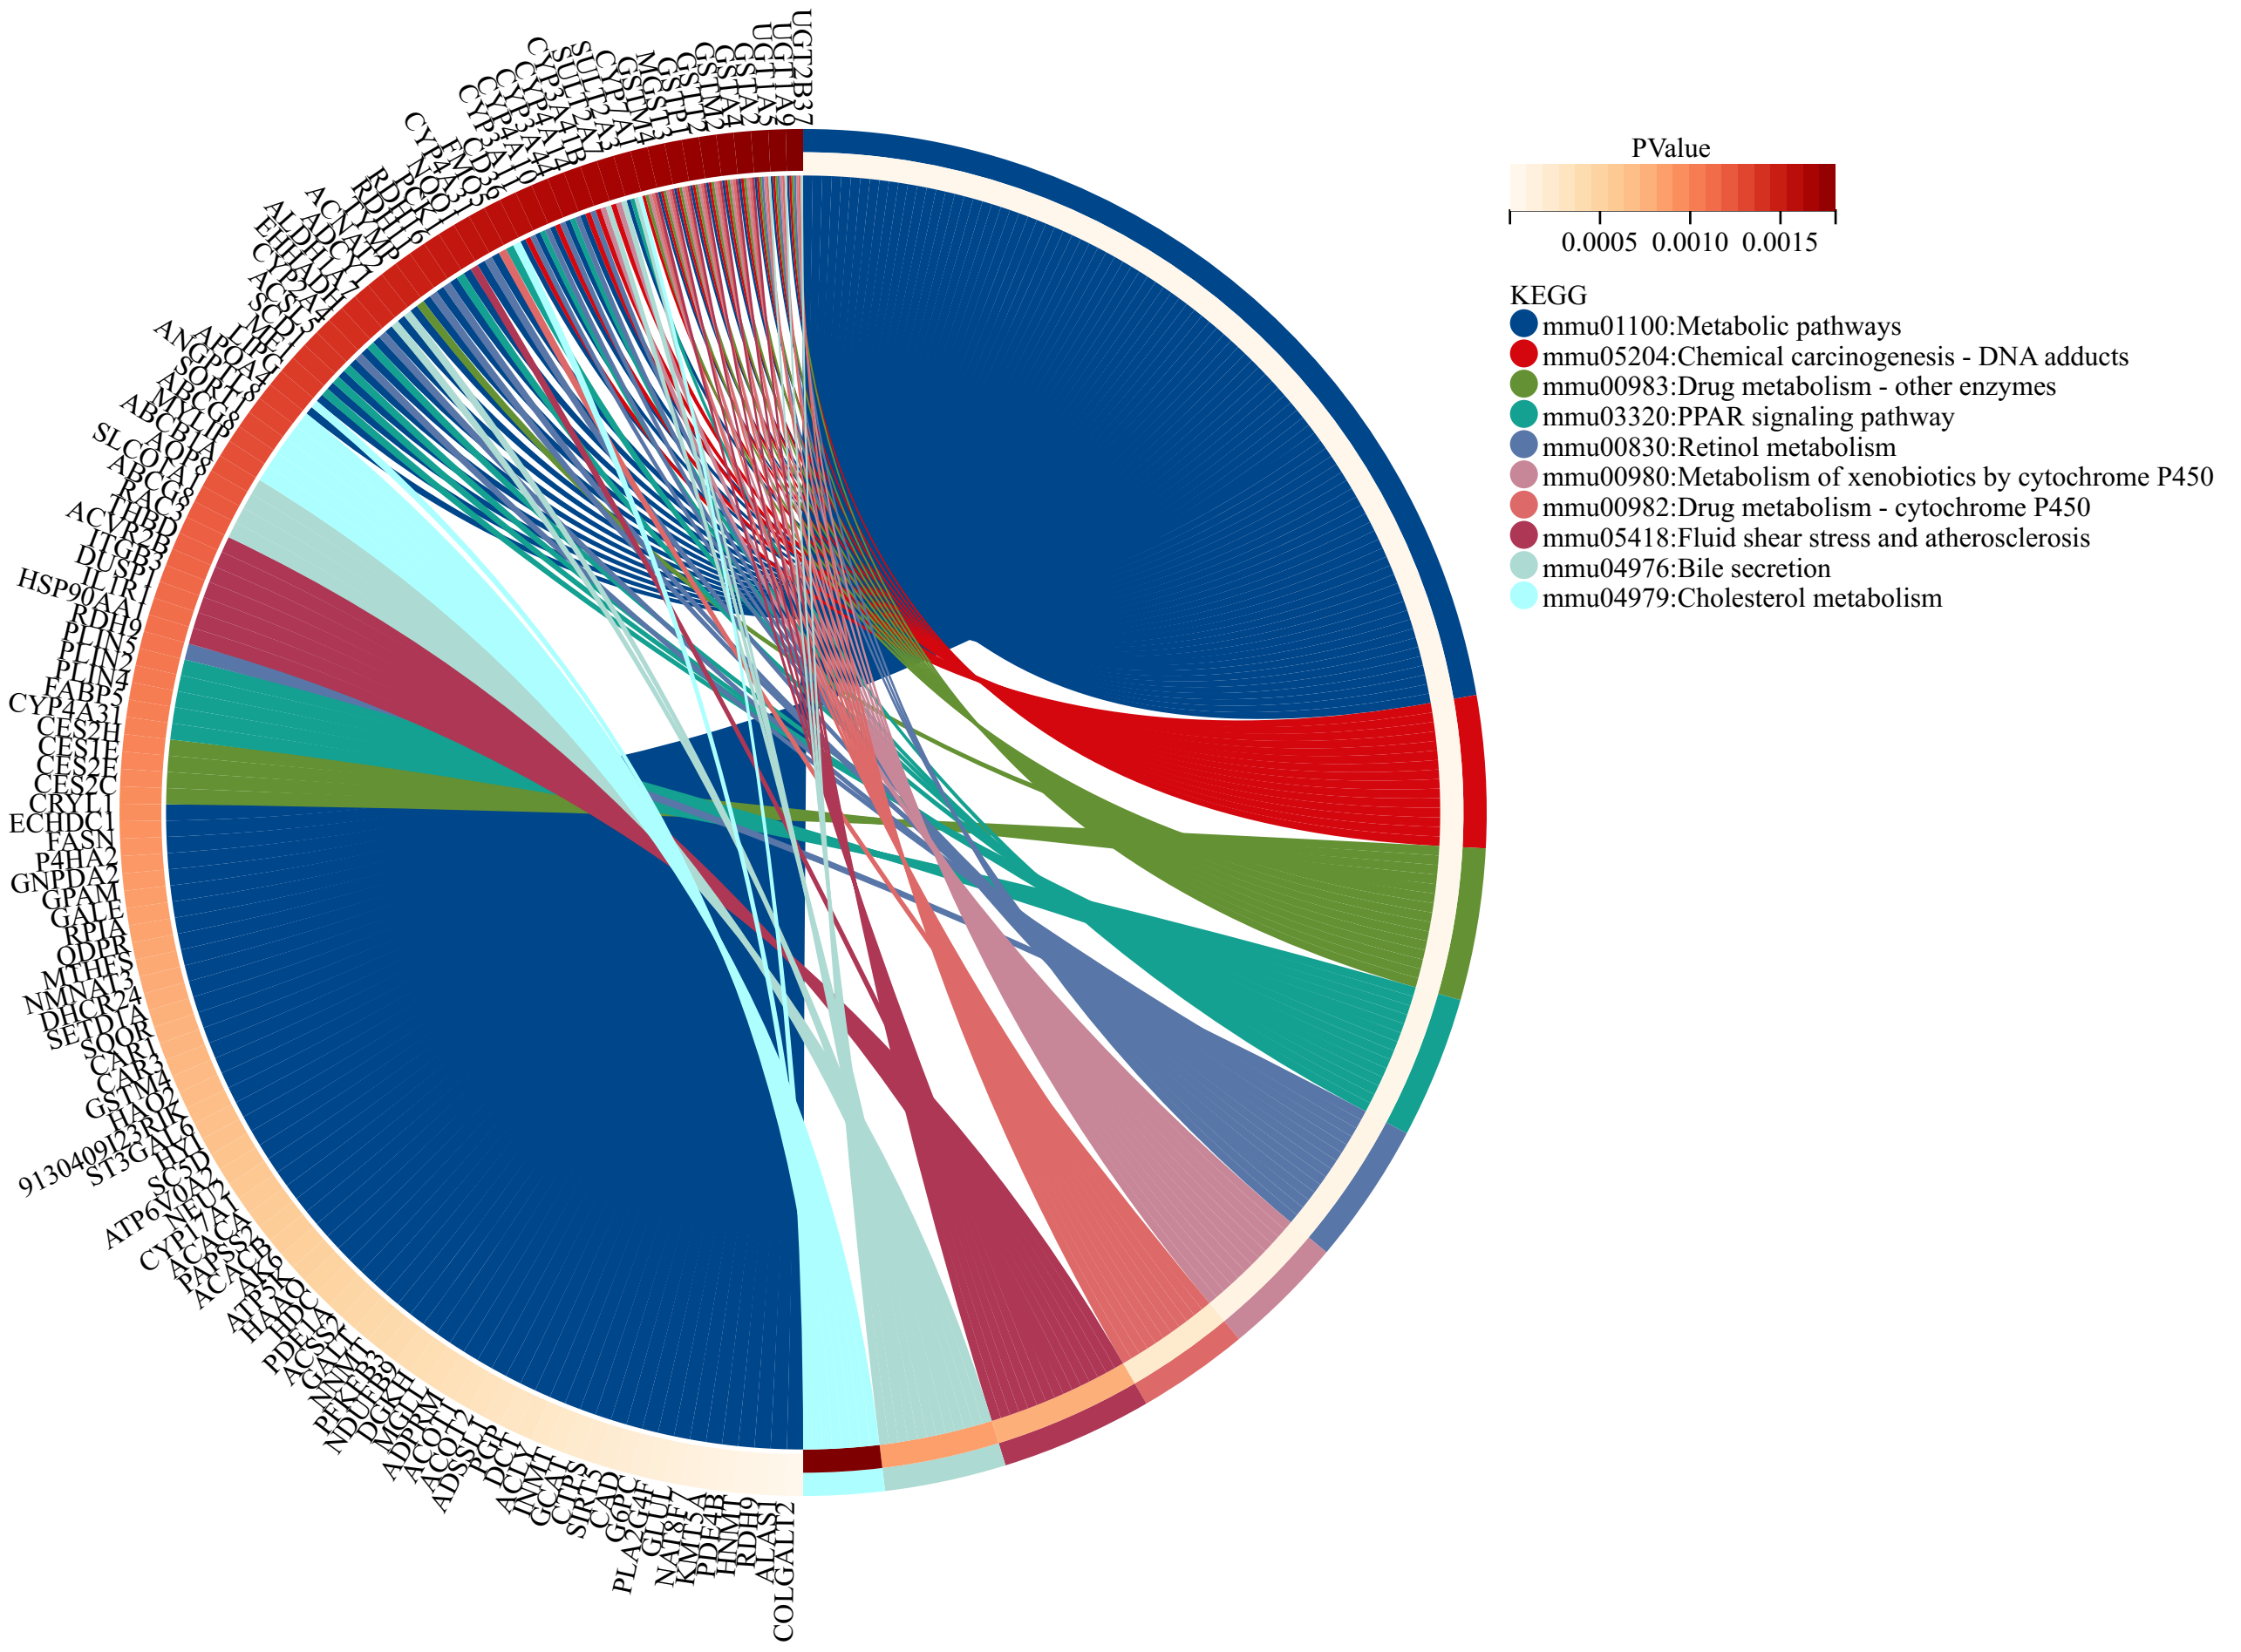

Supplement: s1 [file s1]

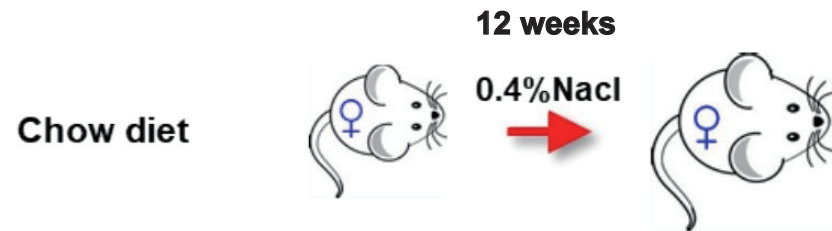

**6 weeks old  
c57BL/6J**

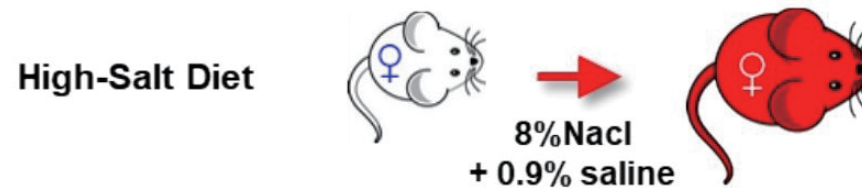

Supplement: s1 [file s1]
